# 1 **Size-reduced embryos reveal a gradient scaling based** 2 **mechanism for zebrafish somite formation**

3  
4 Running title (less than 32 characters): Gradient scaling in somitogenesis

5  
6 *Authors Affiliation:* Kana Ishimatsu<sup>a\*</sup>, Tom W. Hiscock<sup>a</sup>, Zach M. Collins<sup>a</sup>, Dini Wahyu Kartika  
7 Sari<sup>b,c</sup>, Kenny Lischer<sup>b</sup>, David L. Richmond<sup>d</sup>, Yasumasa Bessho<sup>b</sup>, Takaaki Matsui<sup>b</sup> and Sean G.  
8 Megason<sup>a\*</sup>

9 <sup>a</sup> Department of Systems Biology, Harvard Medical School, Boston, MA 02115, USA.

10 <sup>b</sup> Gene Regulation Research, Nara Institute of Science and Technology, Nara 630-0101, Japan.

11 <sup>c</sup> Department of Fisheries, Universitas Gadjah Mada, Yogyakarta 55281, Indonesia.

12 <sup>d</sup> Image and Data Analysis Core, Harvard Medical School, Boston, MA 02115, USA.

13  
14 *Corresponding Authors:*

15 Kana Ishimatsu

16 Department of Systems Biology, Harvard Medical School, Boston, MA 02115, USA

17 617.432.7443

18 kana\_ishimatsu@hms.harvard.edu

19 and

20 Sean G. Megason

21 Department of Systems Biology, Harvard Medical School, Boston, MA 02115, USA

22 617.432.7441

23 megason@hms.harvard.edu

24  
25 **Keywords (3-6):** Scaling, Somite, PSM, segmentation clock, Fgf gradient, quantitative imaging,  
26 mathematical modeling

1

## 2 **Summary statement**

3 By comparing patterning in zebrafish embryos of different size we show that a dynamically  
4 scaling gradient in the presomitic mesoderm regulates somite size control.

5

6

7

## 8 **Abstract**

9 Little is known about how the sizes of animal tissues are controlled. A prominent example is  
10 somite size which varies widely both within an individual and across species. Despite intense  
11 study of the segmentation clock governing the timing of somite generation, how it relates to  
12 somite size is poorly understood. Here we examine somite scaling and find that somite size at  
13 specification scales with the length of the presomitic mesoderm (PSM) despite considerable  
14 variation in PSM length across developmental stages and in surgically size-reduced embryos.  
15 Measurement of clock period, axis elongation speed, and clock gene expression patterns  
16 demonstrate that existing models fail to explain scaling. We posit a “clock and scaled gradient”  
17 model, in which somite boundaries are set by a dynamically scaling signaling gradient across the  
18 PSM. Our model not only explains existing data, but also makes a unique prediction that we  
19 experimentally confirm—the formation of periodic “echoes” in somite size following  
20 perturbation of the size of one somite. Our findings demonstrate that gradient scaling plays a  
21 central role both in progression and size control of somitogenesis.

22

## 23 **Main**

24         Scaling—matching organ size to body size—is a fundamental property of developing  
25 organisms. Even within the same species, developing embryos often vary in size, due to  
26 environmental and maternal variability. In addition, embryo size can change drastically across  
27 developmental stages. Nevertheless, embryos robustly develop with invariant proportions,  
28 suggesting that some mechanism of pattern scaling is encoded in the developmental program  
29 (Cooke, 1981). While the scaling of morphogen-based patterning has received significant  
30 attention, both theoretically and experimentally (Ben-Zvi and Barkai, 2010; Gregor et al., 2005;  
31 Gregor et al., 2008; Inomata et al., 2013; Lander et al., 2011; McHale et al., 2006; O'Connor et

1 al., 2006), understanding has been limited for scaling of other patterning processes, such as  
2 somite segmentation.

3 During embryogenesis, somites provide the first body segments in vertebrates, eventually  
4 giving rise to tissues such as the vertebrae and axial skeletal muscles. Somite segmentation  
5 occurs sequentially in an anterior to posterior progression along the presomitic mesoderm (PSM),  
6 with temporal and spatial periodicity. Temporal periodicity (e.g. somites are formed in  
7 symmetric pairs every 25 min in zebrafish (Schroter et al., 2008)) is known to be generated by a  
8 system of coupled cellular oscillators (Delaune et al., 2012; Lauschke et al., 2013; Masamizu et  
9 al., 2006; Palmeirim et al., 1997), called the segmentation clock, which is driven and  
10 synchronized by complex signaling networks (Dequeant et al., 2006; Hubaud and Pourquie,  
11 2014; Krol et al., 2011). Yet, how these oscillations relate to the spatially periodic pattern of the  
12 mature somites and how somite sizes are determined remains controversial (Akiyama et al.,  
13 2014; Cooke and Zeeman, 1976; Cotterell et al., 2015; Lauschke et al., 2013; Shih et al., 2015;  
14 Soroldoni et al., 2014; Takahashi et al., 2010; Tsiairis and Aulehla, 2016).

15 Somites were first documented to scale in *Xenopus* following surgical bisection of the  
16 egg; the resulting embryos have smaller somites but the same number when compared to intact  
17 control embryos (Cooke, 1975). Although this experiment was performed more than 40 years  
18 ago, the underlying mechanism for somite scaling has not been identified. In particular, the  
19 relationship between PSM length and somite size has been disputed: previous groups have  
20 reported that in intact developing embryos, somite size does not scale with PSM size (Gomez et  
21 al., 2008), while in ex vivo culture of PSM, somite length has been shown to linearly scale with  
22 PSM length (Lauschke et al., 2013).

23 In this study, we demonstrate that somite length indeed scales with PSM length and that  
24 gradient scaling underlies somite scaling, using both surgically size-reduced and normally  
25 developing zebrafish embryos, in combination with live imaging, quantitative measurement, and  
26 mathematical modeling. We demonstrate that the inconsistency in the reported relationship  
27 between PSM size and somite size can be attributed to the time delay between somite  
28 specification and morphological boundary formation. We experimentally measured this delay  
29 and found that somite length always scales with PSM length when this delay is considered. This  
30 result led us to evaluate several variables that could potentially modulate somite length. We  
31 found that clock period, axis elongation speed, and clock gene expression patterns did not scale,

1 whereas the Fgf activity gradient did scale with PSM length. Given this observation, we  
2 developed a “clock and scaled gradient model” based on the original clock and wavefront model  
3 (Cooke and Zeeman, 1976) with a simple yet important refinement; in our model, the gradient  
4 responsible for setting wavefront position dynamically scales to the size of the PSM. Using  
5 transplants, we show that somite derived signals can inhibit Fgf signaling providing a potential  
6 mechanism for gradient scaling. The clock and scaled gradient model not only explains existing  
7 experimental data but also inspired a novel experimental test with an unintuitive outcome—the  
8 creation of “echoes” in somite size following perturbation of the system. Together, we present  
9 the quantitative study of somite scaling as an experimental platform to test the feasibility of  
10 multiple theoretical models.

## 11 **Results**

### 12 **Somite length at specification scales with PSM length throughout developmental time.**

13 Although somite length has been shown to scale with overall body length in *Xenopus* (Cooke,  
14 1975), whether somite length scales with PSM size has been controversial (Gomez et al., 2008;  
15 Lauschke et al., 2013). To test this relationship we measured somite length and PSM length  
16 using live imaging. Initially we did not observe a clear relationship between PSM length and  
17 somite size (see Fig.1F, without delay). However, somite specification within the PSM occurs  
18 long before the appearance of the morphological boundaries (Akiyama et al., 2014; Bajard et  
19 al., ; Dubrulle et al., 2001; Elsdale et al., 1976; Giudicelli et al., 2007; Ozbudak and Lewis, 2008;  
20 Primmitt et al., 1989; Roy et al., 1999) (Fig. 1A), and thus we speculated that the inconsistency  
21 with respect to somite scaling could be attributed to this delay. Although previous studies have  
22 shown the delay is around 4-5 cycles, the delay duration could vary along developmental stages.  
23 To examine if somite length scales with PSM length when this specification to formation delay is  
24 considered, we experimentally measured this delay using embryos from different developmental  
25 stages. Dual-specificity phosphatase inhibitor BCI is known to act immediately on Fgf signaling  
26 leading to an eventual reduction of somite size (Fig. S1) (Akiyama et al., 2014). We transiently  
27 treated embryos at 5 somite stage (ss), 10ss, and 15ss with BCI and measured the length of the  
28 newly formed somites using live imaging for six subsequent cycles (Fig. 1B and C). Regardless  
29 of the developmental stage for the pulse BCI treatment, we observed 4-cycle delay on average  
30 before a visibly smaller somite formed (Fig. 1D). Our experimentally determined delay is similar,  
31 albeit slightly shorter, to what has been proposed in previous work (4-5 cycles) (Akiyama et al.,

1 2014; Bajard et al., ; Dubrulle et al., 2001; Elsdale et al., 1976; Giudicelli et al., 2007; Ozbudak  
2 and Lewis, 2008; Primmitt et al., 1989; Roy et al., 1999). Taking this 4-cycle delay into  
3 consideration, we reexamined the relationship between PSM length and somite size (comparing  
4 the size of the Nth somite with the PSM size at the N-4 ss, Fig. 1E). Strikingly, we found that  
5 somite size indeed scales with PSM size when this 4-cycle delay is considered (Fig. 1F). No  
6 clear relationship between somite and PSM length is apparent without the delay (Fig. 1F). This  
7 relationship between PSM length and somite size was still observed with a 3 or 5 cycle delay,  
8 suggesting that minor fluctuations in the delay or measurement error would not affect the  
9 conclusion (Fig. 1F). The delay between somite specification and formation is reflected in  
10 different peak positions in time course measurements of PSM and somite size (Fig. 1G).  
11 Consideration of this delay may be necessary to assess scaling in previous data (Gomez et al.,  
12 2008; Schroter et al., 2008).

13

14 **Somite length at specification scales with PSM length among individuals with different**  
15 **body sizes.** Given that somite size at specification scales with PSM length throughout  
16 developmental time, we then wondered whether somite length scales with PSM length between  
17 zebrafish embryos of varying sizes. Inspired by classic work in *Xenopus* (Cooke, 1975) on  
18 somite scaling to body size in surgically size reduced embryos, we sought to apply this technique  
19 to zebrafish. We first attempted to cut zebrafish embryos at the blastula stage longitudinally  
20 (along the animal-vegetal axis) as was done in *Xenopus*. However, the resulting embryos had  
21 varying degrees of dorsalization or ventralization presumably due to dorsal determinants being  
22 portioned in unpredictable ways and were difficult to study quantitatively. We thus sought a  
23 method to reduce embryo size without perturbing D-V patterning. By using separate latitudinal  
24 cuts to remove cells near the animal pole and yolk near the vegetal pole at the blastula stage (Fig.  
25 2A left panel), we found that the resulting size-reduced embryos quickly recovered and a large  
26 percentage of them developed normally (Fig. 2A). Total body size and organ size, including  
27 somites, of these size-reduced embryos were found to be smaller (Fig. 2B and C). Consistent  
28 with previous work in *Xenopus* (Cooke, 1975), the chopped embryos had the same number of  
29 somites, each of which was smaller in size (33 in both control and chopped embryos at 1 day  
30 post-fertilization, n=5 for each. Somite number was counted using still images of the live  
31 embryos). Combining this size reduction technique and live imaging, we measured somite and

1 PSM length, and found somite length scales with PSM length between embryos of varying sizes  
2 when the same 4-cycle delay is considered (Fig. 2D, see also Fig. S2). The scaling was observed  
3 throughout our timecourses (from 5 ss to 20 ss, Fig. S3). Taken together, we conclude that  
4 somite length always scales with PSM length as long as the time delay between specification and  
5 morphological boundary formation is considered.

6

7 **Clock period does not scale with PSM length.** Given our finding that somite length scales with  
8 PSM length both over time and among individuals with different sizes, we next asked what  
9 mechanism might link PSM size to somite size. For this purpose, we searched for a component  
10 of the known somite patterning system that scales with PSM length, both across developmental  
11 stages and among individuals. In the classic clock and wavefront model, somite length is the  
12 product of clock period and wavefront regression speed. We first measured the period of the  
13 segmentation clock both in control and chopped embryos over time, since it is known that a  
14 change in the period of clock gene expression causes a change in somite length (Herrgen et al.,  
15 2010; Kim et al., 2011; Schroter and Oates, 2010). We measured the clock period as the time  
16 between the formation of successive somite boundaries, and found that this period is similar and  
17 does not scale with PSM length between control and chopped embryos (Fig. 3A, Fig. S4) or  
18 between those at different developmental stages (Fig. 3B) (Schroter et al., 2008), suggesting that  
19 scaling is not achieved by regulation of clock period.

20

21 **Axis elongation speed does not scale with PSM length.** We next quantified the axis elongation  
22 speed, since slower axis elongation is known to lead to shorter somite length (Goudevenou et al.,  
23 2011; Rauch et al., 1997). One explanation for this comes from the clock and wavefront model,  
24 in which the wavefront speed (and hence somite size) has often been directly linked to axis  
25 elongation speed (Cooke and Zeeman, 1976; Dubrulle and Pourquie, 2004; Hubaud and Pourquie,  
26 2014; Saga, 2012). This possibility is also consistent with the idea that a gradient of Fgf is  
27 established by mRNA decay coupled with axis elongation, and that this drives wavefront  
28 progression (Dubrulle and Pourquie, 2004). Therefore, we expected somites to be smaller in  
29 chopped embryos due to a decrease in the axis elongation speed (e.g. cells are incorporated into  
30 the PSM at the tailbud at a slower rate). We measured the change in axis length, defined by a  
31 distance between the posterior boundary of 4<sup>th</sup> somite and the tail tip, over time (Bajard et al.,

1 2014). Contrary to our expectation, we found that axis elongation speed did not differ between  
2 control and chopped embryos, at least for 5ss – 15ss (Fig. 3C, Fig. S4). This seemingly  
3 confusing result can be explained if the major mechanism of axis elongation at these stages is,  
4 for example, convergence and extension, whose rate should not be size dependent (Steventon et  
5 al., 2016). Notably, the axis elongation speed was nearly constant over our experimental time  
6 window (Fig. 3D), although PSM size decreased drastically. Since axis elongation speed neither  
7 changes over time as somites decrease in size nor between embryos of varying sizes, altered axis  
8 elongation speed cannot explain scaling of somite patterning.

9

10 **Wavelength of *her1* traveling waves does not scale with PSM length.** We then asked if the  
11 wavelength of the traveling wave pattern of a segmentation clock gene (e.g. *her1*) could explain  
12 scaling of somite formation. Canonical segmentation clock genes exhibit traveling waves; a  
13 stripe pattern that sweeps through the PSM from posterior to anterior due to a phase delay toward  
14 the anterior direction. While these traveling waves have not been experimentally shown to cause  
15 somite size alterations, a correlation between wavelength (spatial interval of the stripes) and  
16 somite length has been observed (Jorg et al., 2016; Lauschke et al., 2013). To determine whether  
17 *her1* traveling waves are involved in scaling, we generated and quantified phase maps from *her1*  
18 *in situ* hybridization samples (Fig. 3E). We extracted the phase information from signal  
19 intensities using a wavelet transform, then converted the approximately linear phase gradient into  
20 an effective wavelength, defined as the distance between peaks of *her1* intensity (Fig. 3E). We  
21 measured the phase gradient from an area of PSM including B-4 (the presumptive position  
22 corresponding to a morphological boundary four cycles later, blue line in Fig. 3E, left panel). We  
23 also measured the phase gradient manually, by identifying peaks and troughs in the intensity  
24 profile (orange triangles in Fig. 3E, right panel). This manual measurement was found to  
25 correspond well with phases obtained from the wavelet transform (green line in Fig. 3E, left  
26 panel). We found that unlike somite size, wavelength does not always scale with PSM size:  
27 although the wavelength scales with PSM size following embryonic size reduction, it does not  
28 scale during embryonic development (Fig. 3 F and G) (Holley et al., 2000). This is consistent  
29 with recent work demonstrating that the number of *her1* waves changes over time, confirming  
30 that the phase gradient does not scale with PSM size (Soroldoni et al., 2014). Since somite size  
31 scales with PSM size over developmental stages as well as among individuals of different size,

1 this result indicates that it is unlikely that the somite scaling is achieved through regulation of the  
2 wavelength of *her1*. The conclusion is supported by a previous study which showed that repeated  
3 induction of *deltaC* expression in a *deltaC* mutant background can successfully rescue somite  
4 boundary formation, although the induced *deltaC* expression did not show the traveling wave  
5 pattern (Soza-Ried et al., 2014).

6  
7 **The Fgf activity gradient scales with PSM length.** Our final candidate feature that could relate  
8 somite size to PSM size was the Fgf gradient (Akiyama et al., 2014; Dubrulle et al., 2001;  
9 Sawada et al., 2001). To measure Fgf signaling we used whole mount immunohistochemistry  
10 against doubly phosphorylated Erk (dpErk), a downstream readout of Fgf activity, and extracted  
11 the signal intensity. We found that the gradient range varies considerably between embryos on an  
12 absolute length scale, but is consistent when plotted as a function of relative PSM length, both  
13 for control and chopped embryos (Fig. 3H and I, Fig. S5 and S6) and for embryos from different  
14 developmental stages (Fig. 3J and K, Fig. S5 and S6). We further tested if Fgf activity scales  
15 with PSM size in embryos carrying a FRET-based Erk biosensor (Fig. 3 L-S). We calculated the  
16 PSM location where the relative intensity of FRET signal crosses 50% of the maximal intensity  
17 (L50) (Fig. 3P). Recent work using the Erk live reporter showed that this L50 is a good  
18 approximation of the future somite boundary (Sari et al., 2018). Time course analysis of L50 in  
19 both control and chopped embryos confirmed that the Fgf activity gradient scales with PSM size  
20 (Fig. 3Q-S). L50 analysis was further performed when Fgf activity was measured by dpErk and  
21 by *sprouty4* mRNA, a downstream gene of Fgf signaling, and also confirmed Fgf activity scaling  
22 (Fig. S7). Since Wnt signaling is also known to form a gradient in the PSM, we examined  
23 whether Wnt signaling scales with PSM length. We performed L50 analysis on expression  
24 patterns of *sp5l* mRNA, a downstream gene of Wnt signaling (Thorpe et al., 2005), and found  
25 Wnt activity also scales with PSM length (Fig. S8).

26  
27 **A clock and scaled gradient model can explain somite scaling.** Given our observation of a  
28 dynamically scaling gradient, we turned to modeling to see whether this feature is capable of  
29 explaining scaling of somite patterning. In the original clock and wavefront model, the timing of  
30 somite boundary specification is controlled by a clock and the positioning by the level of a signal  
31 that encodes a posteriorly moving wavefront. How the position of the wavefront is determined at



1 each time point is unspecified in the original model. Importantly, our observations reveal that the  
2 activity of signaling molecules linked with wavefront activity forms a dynamic gradient that  
3 scales with PSM size. We term this updated model the “clock and scaled gradient” model. In this  
4 model, scaling of the gradient to PSM size generates a posteriorly moving wavefront, when it is  
5 combined with axis elongation (which increases PSM size) and somite formation (which  
6 decreases PSM size) (Fig. 4 A and B). We constructed a simple mathematical model to formalize  
7 these interactions (Supplementary Materials and Methods) and found that this model can  
8 successfully reproduce our biological results on somite size scaling (Fig. 4C-F and  
9 Supplementary Movie). Similar somite formation dynamics can be observed regardless of the  
10 precise shape of the gradient (Fig. 4C and D; steep sigmoidal gradient, Fig. 4E and F; linear  
11 gradient). Interestingly, we also observed step-wise rather than continuous regression of the L50  
12 in our model (Fig. 4G and H), consistent with recent results (Akiyama et al., 2014). Moreover  
13 using this model, we can also accurately predict the resulting changes in somite size following a  
14 wide range of additional previously-published perturbations (Fig. 4 I and J): one smaller somite  
15 following transient Fgf activation (Akiyama et al., 2014) (Fig. 4I); multiple smaller somites  
16 followed by one larger somite after Fgf bead transplantation (Dubrulle et al., 2001; Sawada et al.,  
17 2001) (Fig. 4I); larger somites with a slower clock (Herrgen et al., 2010; Kim et al., 2011;  
18 Schroter and Oates, 2010) (Fig. 4I); smaller somites with slower axis elongation (Goudevenou et  
19 al., 2011; Rauch et al., 1997) (Fig. 4I); and scaling of somite and PSM size *in vitro* under culture  
20 conditions that do not permit axis elongation (Lauschke et al., 2013) (Fig. 4J). We found that in  
21 all cases, the model’s predictions were in agreement with experimental results.

22  
23 **The clock and scaled gradient model predicts one larger somite in long-term Fgf inhibition.**

24 A simple perturbation to test our model is long-term Fgf inhibition. This experiment was recently  
25 carried out using chick embryos and multiple larger somites were shown to form during long-  
26 term Fgf inhibition (Cotterell et al., 2015). This result was contradictory to what the clock and  
27 wavefront model would predict, but consistent with a novel Turing framework for somitogenesis  
28 (Cotterell et al., 2015). We simulated the same perturbation using our clock and scaled gradient  
29 model and found that it predicts the same result as the clock and wavefront model: only one  
30 larger somite (Fig. 4K). To test if the long-term Fgf inhibition has the same effect in zebrafish  
31 embryos, we treated zebrafish embryo with the Fgf inhibitor, SU5402 (Sawada et al., 2001), at a

1 low concentration (16  $\mu$ M) in which embryos grew until late stages. Unlike in chick (Cotterell et  
2 al., 2015), we observed one larger somite but not multiple larger somites following long-term  
3 SU5402 treatment (Fig. 4L and M, Fig. S9, for individual data, see Fig. S13), consistent with our  
4 model. Moreover, we observed the same tendency under constant darkness, confirming the result  
5 we obtained was not due to the light instability of SU5402 (10 out of 11) (Fig. S10). These  
6 differences in results could potentially be explained by how acutely the drug can be  
7 administered: in zebrafish, embryos can be soaked in a vast excess of drug causing a rapid step  
8 up in drug levels followed by a plateau in vivo, whereas in chick the drug levels may rise more  
9 slowly. Simulations showed that increasing Fgf inhibition over a few hours can cause multiple  
10 large somites in our model (Fig. S11).

11  
12 **Newly formed somites play a critical role in gradient scaling.** One potential mechanism of  
13 gradient scaling is that newly formed somites modulate the gradient, for example, by secreting a  
14 negative regulator. To examine whether the newly formed somite can modulate the gradient, we  
15 transplanted a newly formed somite into the posterior PSM, and compared it to a control  
16 experiment in which PSM cells were transplanted to the same axial level (Fig. 5A). From our  
17 model, we predicted that the ectopically transplanted somite would locally inhibit Fgf signaling.  
18 One to two cycles (0.5-1 hour) after transplantation, the embryos were fixed and stained for  
19 dpErk. We found that in the PSM surrounding the transplanted somite, the dpErk level was  
20 significantly decreased (Fig. 5B), whereas the dpErk level in the PSM surrounding transplanted  
21 PSM cells was largely unaffected (Fig. 5C). To quantify Erk activity, we normalized the dpErk  
22 signal near the transplant with that of the non-transplanted side of the same embryo at the same  
23 axial level (Fig. 5A). We found the dpErk levels around the transplanted somite to be  
24 significantly lower than the control (Fig. 5D). These data support our hypothesis that mature  
25 somites rapidly and potently modulate the Fgf activity gradient to effect gradient scaling.

26  
27 **A unique prediction from the clock and scaled gradient model: an “echo effect” on somite**  
28 **size**

29 We next sought a novel experimental test for which our model makes a unique prediction.  
30 Key aspects of the clock and scaled gradient model are the 4-cycle delay between somite  
31 specification and formation, and the feedback between newly formed somites and gradient length.

1 We thus reasoned that if we experimentally created one larger somite, it would shorten the PSM  
2 and rescale the gradient in a jump, which would then result in another larger somite four cycles  
3 later, and this process would repeat creating “echoes” of larger somites with a ~4-cycle  
4 periodicity (Fig. 6A). Simulations of our model supported this idea (Fig. 6B and C).

5 To test this prediction we transiently treated embryos with the Fgf inhibitor, SU5402, which is  
6 known to induce a larger somite (Dubrulle et al., 2001; Sawada et al., 2001), followed by  
7 extensive washes for two hours, then performed live imaging to measure the length of the newly  
8 formed somites (Fig. 6D). Strikingly, we found that somite size became smaller and larger with a  
9 several-cycle period, which was uniquely predicted by the clock and scaled gradient model (Fig.  
10 6E and F, for individual data, see Fig. S12). We noted that the periodicity was not always  
11 precisely 4 (Fig. 6F), possibly due to internal fluctuation of the delay time or experimental  
12 variation, such as variation in washout timing of SU5402. By analyzing individual embryos (Fig.  
13 S12), we confirmed that all the peaks of somite size in pulse SU5402 treated embryos are larger  
14 than those in control embryos (Fig. 6G). Our model also predicts the echo effect for long-term  
15 SU5402 treated embryos which we experimentally confirmed (Fig. S13), but we chose to focus  
16 on transient treatment because the embryos are healthier. The echo effect was also seen in  
17 embryos transiently treated with BCI (Fig. S14). These results confirm that the echo effect is a  
18 general phenomenon for somite formation. We note that a potentially related phenomenon has  
19 been seen following heat-shock in chick and zebrafish (Primmitt et al., 1988; Roy et al., 1999)  
20 but through an unclear mechanism.

21 We next evaluated the effect of transient SU5402 on both dpErk activity and *her1*  
22 wavelength (Fig. 6H-K, for individual dpERK data, see Fig. S15). To perform time-course  
23 analysis, we fixed the embryos every 30 min following SU5402 treatment (Fig. 6H). dpErk  
24 immunostaining confirmed quick recovery of Fgf activity after SU5402 treatment (Fig. 6I).  
25 Furthermore, as we assumed, the dpErk activity was found to scale with the induced smaller  
26 PSM (Fig. 6J). In contrast, we found no significant difference in *her1* wavelengths between  
27 control and SU5402 treated embryos (Fig. 6K), suggesting that gradient scaling, and not *her1*  
28 waves, are responsible for the echo effect.

29 This echo effect is only predicted if the “specification position” of new somites (rather  
30 than the somite itself) scales with PSM size, which is the core assumption of the clock and scaled  
31 gradient model (Fig. 6L-N). Without gradient scaling, the clock and wavefront model predicts a

1 single smaller somite following the induced larger somite, but the size of the following somites  
2 immediately returns to normal (Fig. 6L), consistent with previous theoretical work (Baker et al.,  
3 2006). Interestingly, for a class of mechanisms that assumes that the “size” of a somite is what is  
4 determined, rather than the “position” of the next somitic furrow (e.g. somite size is determined  
5 by the wavelength of traveling waves, or the wavelength of a Turing-type pattern), then the  
6 predicted result is qualitatively different (Fig. 6M). In these models, somite size scales with the  
7 smaller PSM resulting from the induced larger somite, and then somite size gradually goes back  
8 to the normal size without rebounding dynamics. Together, the clock and scaled gradient model  
9 is uniquely supported by our experimental tests.

10

### 11 **Traveling waves have a minor effect in the clock and scaled gradient model**

12 Spatial differences in the phase of the coupled oscillators comprising the segmentation  
13 clock give the appearance of traveling waves of clock gene expression in the PSM from the  
14 posterior to the anterior (Ares et al., 2012; Ay et al., 2014; Giudicelli et al., 2007; Morelli et al.,  
15 2009; Uriu et al., 2009), but a mechanistic role for these waves is unclear. Consistent with  
16 previous theoretical work (Ares et al., 2012; Morelli et al., 2009), our simulations show that  
17 traveling waves arise in systems of coupled oscillators under a wide variety of conditions  
18 including spatial variation in intrinsic frequency, coupling strength, and coupling phase delay, as  
19 well as due to differences in boundary conditions (Fig. S16), and thus their existence may not be  
20 significant. Thus far we have assumed synchronous oscillations throughout the PSM in our  
21 model for simplicity, as was done in the original clock and wavefront model (Cooke and Zeeman,  
22 1976). To see if traveling waves affect the clock and scaled gradient model, we assumed a simple  
23 linear phase gradient along the AP axis (for details, see supplementary materials and methods)  
24 and repeated the simulations. As shown in Fig. 7A, this results in only a minor modification to  
25 somite sizes as compared to a model without a phase gradient. Interestingly, we noticed that the  
26 somite formation period (defined as the time between successive boundaries being specified) was  
27 smaller when including a phase gradient (Fig. 7B). This is consistent with the observation of the  
28 segmentation period in zebrafish being slightly faster than the intrinsic clock period - a  
29 phenomenon likened to the Doppler Effect (Soroldoni et al., 2014), in which an observer moving  
30 towards a source of traveling waves measures a higher frequency than the intrinsic frequency of  
31 the oscillators. We interpret this effect as caused by the wavefront moving towards the tailbud

1 during development due to gradient scaling as the PSM shrinks rather than a change in arrival  
2 time of traveling waves to the anterior boundary (Fig. 7C). These results show that 1) phase-  
3 gradients have only minor effects on the clock and scaled gradient model and that 2) a model not  
4 based on traveling waves can also explain the Doppler effect.

5

## 6 **Discussion**

7 Here we have proposed a novel mechanism for somite size control: the clock and scaled  
8 gradient model. This model is based on the original clock and wavefront model but 1) the  
9 wavefront specifies new somite boundaries at a fixed *relative* position along the PSM due to  
10 gradient scaling, and 2) there is a delay between somite boundary specification and formation.  
11 Previously, multiple models of somitogenesis have been proposed, but were difficult to  
12 experimentally distinguish since they were all consistent with existing data from wild type  
13 embryos as well as existing experimental perturbations. Here we utilized a novel perturbation—  
14 changing system size—to discriminate between existing models, and showed that only the clock  
15 and scaled gradient model can explain existing data and our new experimental data. We found  
16 that in patterning of the somites, somite length scales with PSM length *in vivo*. Importantly, we  
17 demonstrate that the delay between somite boundary specification and formation is critical to  
18 examining the relationship between somite and PSM length. This is because the change in PSM  
19 length (and as a result, somite length) is dynamic, as a result of the changing rates of PSM  
20 production by axis elongation and consumption by somite formation (Fig. 1G). Consistently,  
21 when the PSM is grown in culture conditions that do not permit axis extension, there is a  
22 monotonic decrease in PSM size and somite-PSM scaling is observable without considering the  
23 delay (Lauschke et al., 2013). Considering the delay time between somite boundary specification  
24 and the appearance of a morphological somite will be essential in studying somite scaling in  
25 other situations, such as in other species, where complex dynamics of PSM length can be  
26 observed (Gomez et al., 2008; Schroter et al., 2008).

27 The clock and wavefront model is the classic model for somitogenesis (Cooke and  
28 Zeeman, 1976) and explains a number of previous experimental observations. In the original  
29 clock and wavefront model, what controls wavefront progression and how it is linked to axis  
30 elongation is unspecified. A simple way to specify wavefront progression is to just tie it to axis  
31 elongation (Cooke and Zeeman, 1976; Dubrulle and Pourquie, 2004; Hubaud and Pourquie,

1 2014; Saga, 2012). The consequence of this version of the clock and wavefront model is that  
2 somite size is equal to how far the tail moves in one clock cycle. While many of the existing  
3 perturbations can be explained by this version of the clock and wavefront model, a key feature  
4 that cannot be predicted is the phenomenon of scaling. For example, in the absence of axis  
5 elongation no somites should form, but this prediction is contradicted by in vitro cultured PSM  
6 which has no axis elongation yet forms a series of progressively smaller somites (Lauschke et al.,  
7 2013). Similarly, this simple clock and wavefront model does not predict the non-monotonic  
8 somite size variations following induction of a single large somite, as seen in Fig. 6, since  
9 perturbations to the anterior PSM should not affect wavefront position.

10 An alternative class of models for explaining somite formation is based on using the  
11 wavelength of traveling waves in determining somite size (Jorg et al., 2015; Jorg et al., 2016;  
12 Lauschke et al., 2013). However, previous studies in addition to our new results suggest that the  
13 wavelength of the traveling waves is not the primary mechanism to set somite sizes. First, the  
14 simple scenario (Lauschke et al., 2013) assumes that the phase gradient (inverse of wavelength)  
15 of the entire PSM scales with PSM length and that the scaled wavelength sets the somite size.  
16 However, previous results (Soroldoni et al., 2014) and our results show that phase gradient does  
17 not always scale with PSM length, which argues against this simple mechanism. Second, one  
18 could still imagine some modification of the simple wavelength model could explain the in vivo  
19 situation of somite scaling (e.g., the wavelength at B-4 locally scales with PSM length). However,  
20 this model is still hard to reconcile with the echo effect we observed after inducing one large  
21 somite (Fig. 6), because regardless of the details, this class of models assumes somite “size” (not  
22 somitic furrow position) is controlled by the wavelength. In Fig. 6M, we explicitly model the  
23 case where somite sizes scale with PSM size (including the 4-cycle delay) and find that it cannot  
24 explain the echo effect. In order to directly test if traveling waves are functional, one should  
25 experimentally modify the spatial pattern of the waves (for example, changing or eliminating the  
26 spatial phase gradient), without affecting the intrinsic period of the oscillators (Soza-Ried et al.,  
27 2014), and a mechanism for detecting a spatial gradient in clock gene expression level should be  
28 proposed. We suggest that traveling waves may be a byproduct of the need to synchronize  
29 oscillators locally (within the spatial scale of a somitic furrow), that while visually striking and  
30 mathematically interesting, have only a peripheral role in somite formation.

31 Another type of model is ‘Turing-like’, in which somites are formed via a combination of

1 an oscillator and a periodic Turing instability (Cooke and Zeeman, 1976; Cotterell et al., 2015).  
2 There are several reasons why our data does not support Turing-like models. Firstly, a recent  
3 paper (Cotterell et al., 2015) showed how a Turing-like model of somitogenesis could, in  
4 principle, explain somite scaling, if one allowed the level of Fgf to effectively modulate the  
5 Turing-spacing of the somites. However, the change in somite size in response to PSM length is  
6 small, and is inconsistent with our *in vivo* measurement where somite length is almost  
7 proportional to PSM length (Fig. 1F and 2D). A second argument against a Turing-like model is  
8 that, unlike the clock and wavefront and clock and scaled gradient models, the ‘clock’ is not  
9 separable from the other components in the system. Therefore we don’t necessarily expect a  
10 slower clock to increase somite size, at least not in perfect proportion as has been observed *in*  
11 *vivo* (Herrgen et al., 2010; Kim et al., 2011; Schroter and Oates, 2010) since a change in clock  
12 period would be associated with other parameters. Thirdly, the assumption that Fgf modulates  
13 the Turing-spacing of somites is incompatible with the results of perturbing Fgf, specifically: 1) a  
14 Turing-like model predicts consistently larger somites following sustained Fgf inhibition, which  
15 we do not see (Fig. 4 L and M); 2) a Turing-like model predicts a symmetric effect of implanting  
16 a Fgf bead (i.e. smaller somites anterior and posterior to the bead) unlike what is seen *in vivo*  
17 which shows a definite anterior-posterior bias (Dubrulle et al., 2001; Sawada et al., 2001).  
18 Finally, it is difficult to reconcile a Turing-like model with the echo effect (Fig. 6). The reason is  
19 that, like the phase-gradient model, and unlike the clock and scaled gradient model, Turing-like  
20 models fundamentally control somite size, not somite boundary position. Therefore, for exactly  
21 the same reasons as argued for the phase-based models, even with perfect somite size scaling in  
22 wildtype embryos, we do not predict the non-monotonic segment size variation following  
23 transient Fgf inhibition.

24 The clock and scaled gradient model presented here is a fairly simple model. We used a  
25 simple model for three reasons: 1) so that the key assumptions of the model (clock + scaling  
26 gradient) are directly supported by experimental data; 2) so that the model is at the right level of  
27 detail to make comparisons to our data; and 3) so that the model gives us a qualitative and  
28 intuitive understanding of somite size control, which may be obscured in a more complex model  
29 (Gunawardena, 2014). However, the model’s simplicity does mean that it should not be viewed  
30 as a comprehensive, nor completely realistic, model of somitogenesis. Firstly, we have assumed  
31 that somite maturation, and its effects on gradient scaling, occur instantly, whereas in reality we

1 expect this to be a more gradual effect. Mathematically, this might mean that the 4-cycle delay  
2 should be changed from a step function to a more slowly varying function. This modification  
3 may be particularly important to understand the formation of the first four somites, and to reduce  
4 the sensitivity of somite size to initial conditions and/or perturbations. A second shortcoming of  
5 our model is that we have chosen the somite boundary to be set by a simple threshold of the  
6 gradient - an assumption that has not been directly measured, and is likely a simplification.  
7 Thirdly, we have largely focused on dpErk as readout of wavefront activity and demonstrated  
8 dpErk scaling as a proof of concept. However, the wavefront could be set by a complex function  
9 of multiple inputs such as Fgf and Wnt along with downstream signal integration (Bajard et al.,  
10 2014; Stulberg et al., 2012; Wahl et al., 2007), without affecting the core conclusions of our  
11 model. As reported, dpErk shows a steep gradient (Akiyama et al., 2014), but in our model,  
12 similar somite formation dynamics can be observed regardless of the precise shape of the  
13 gradient; even a simple linear gradient can recapitulate the *in vivo* behavior rather closely (Fig.  
14 4E and F). And finally, the molecular mechanism of gradient scaling remains to be determined.  
15 Numerous regulatory interactions have been shown in the posterior axis between Fgf, Wnt,  
16 Brachyury, Sprouty, and Retinoic Acid so these are all candidates (Diez del Corral et al., 2003;  
17 Olivera-Martinez and Storey, 2007).

18 One reason we chose to look at scaling of somites in size-reduced embryos is that we  
19 thought we might discover a mechanism for scaling that is *not* based on scaling of a molecular  
20 gradient (e.g. change in axis extension speed, growth rate, phase gradient, oscillation period).  
21 However, in the end we found that scaling of a molecular gradient is indeed what underlies  
22 somite scaling as has been observed in other examples of pattern scaling (Ben-Zvi and Barkai,  
23 2010; Howard and ten Wolde, 2005; Umulis and Othmer, 2013). Future research on this issue  
24 could reveal what design benefits (e.g. robustness, evolvability) systems employing gradient  
25 scaling have compared to other potential mechanisms for scaling.

26

## 27 **Methods**

28 **Fish care.** Fish (AB) were kept at 27°C on a 14-hr-light/ 10-hr-dark cycle. Embryos were  
29 collected by natural crosses. All fish-related procedures were carried out with the approval of  
30 Institutional Animal Care and Use Committee (IACUC) at Harvard University.

31



1 **Size reduction technique.** Chorions were enzymatically removed using pronase (Sigma Aldrich,  
2 1mg/ml in egg water (Westerfield, 2000)) at ~512 cell stage. Eggs were treated with pronase  
3 until the chorions loses their tension and washed gently with egg water. Remaining chorions  
4 were removed manually using tweezers. The embryos were placed on a glass dish with 1/3  
5 Ringer's solution (Westerfield, 2000), with 2% methylcellulose (Sigma Aldrich) in 1/3 Ringer's  
6 solution spread thinly on the bottom of the dish, to restrict movement embryos. We found using  
7 1/3 Ringer's solution is critical for embryos to recover from the damage of chopping. Then the  
8 blastoderm was chopped at the animal pole, and the yolk was wounded, resulting in oozing out  
9 of the yolk, using either hand-pulled glass pipette or looped stainless steel wire (30  $\mu$ m in  
10 diameter) glued in the capillary glass. The chopped embryos were incubated in the 1/3 Ringer's  
11 solution for 30 min, and then moved to fresh 1/3 Ringer's solution for further incubation. The  
12 survival rate of the chopped embryos varies depending on condition of the embryos. Healthy  
13 embryos and good dissection would give ~60% success rate of developing normally until late  
14 stages (at least several days). The ratio of remaining cells and yolk affects how normal the  
15 embryos develop; usually cutting 50% position of blastula horizontally and wounding the vegetal  
16 part of yolk produces good results.

17  
18 **BCI and SU5402 treatment.** Embryos were treated with BCI (Dual Specificity Protein  
19 Phosphatase 1/6 Inhibitor, Calbiochem) as described (Akiyama et al., 2014). For SU5402  
20 treatment, embryos were treated at a low concentration (Calbiochem, 16  $\mu$ M) to minimize  
21 toxicity.

22  
23 **Imaging.** For live imaging, the embryos were mounted laterally using the dorsal mount  
24 (Megason, 2009) in egg water with 0.01% tricaine (Wentern Chemical, Inc.). Live imaging was  
25 performed using Zeiss Axio Observer Z1 and AxioCam MRm. For multiple image acquisition,  
26 we used a motorized stage, controlled by AxioVision 4.8. The temperature was maintained at  
27  $28.5 \pm 0.5^\circ\text{C}$  using a home-made incubator. The images were taken every 2 min, and the size of  
28 z slice varied depending on the size of embryos. The images of the *in situ* hybridization samples  
29 were also acquired using Zeiss Axio Observer Z1. The images of dpErk immunostaining samples  
30 were acquired using Leica TCS SP8. Finally, a Nikon Ti spinning disk confocal was used to  
31 acquire the images of transplanted samples.

1  
2 **Image processing.** Image processing was done using FIJI (Schindelin et al., 2012) and Matlab  
3 custom code. For time course measurement of axis elongation and somite size, we used the  
4 Gaussian-based stack focuser in FIJI. For axis elongation measurement, the length from 4<sup>th</sup>  
5 somite to tail tip was measured, using FIJI's LOI interpolator. For *in situ* hybridization samples  
6 and immunostaining samples, noise was first reduced using Gaussian blur (sigma = 7.0), and the  
7 signal was extracted along AP axis, using FIJI's Plot profile function. To compare intensity  
8 profiles of BCI and SU treated embryos (Fig. S1 and S9), we averaged over multiple embryos.  
9 To calculate relative intensity, first, the minimum value was set to 0; and then the intensities at  
10 each position was scaled with a scaling factor of (average maximum intensity in drug treated  
11 embryo/average maximum intensity of untreated embryo).

12  
13 ***In situ* hybridization and immunostaining.** *In situ* hybridization (Nikaido et al., 1997) was  
14 performed as previously described. dpErk immunostaining was performed basically following  
15 the protocol described in Sawada et al.(Sawada et al., 2001), except that we used Alexa Fluor  
16 488 goat anti-mouse IgG (ThermoFisher Scientific A-11001) as the 2<sup>nd</sup> antibody. Nuclei were  
17 stained with propidium iodide (Life Technologies P1304MP).

18  
19 **Somite/PSM transplantation.** Transplantation was performed as described (Haines et al., 2004;  
20 Kawanishi et al., 2013), with minor modification. For making a cut on the skin, we used a mouth  
21 pipette filled with pancreatin, so the cut can be made both physically and enzymatically.  
22 Embryos for donor tissue were injected with Alexa Fluor 680 conjugated 10,000 MW Dextran,  
23 which can be detected directly after immunostaining.

24  
25 **Live imaging of Erk activity dynamics.** The FRET-based Erk biosensor termed Eevee-ERKnl  
26 is composed by an enhanced cyan-emitting mutant of GFP (ECFP), a WW domain (ligand  
27 domain), an EV linker, an Erk substrate (sensor domain), a yellow fluorescent protein for energy  
28 transfer (Ypet), and a nuclear localization signal (NLS) (Komatsu et al., 2011). When Erk  
29 phosphorylates the Erk substrate, the WW domain binds to the Erk substrate, leading to the  
30 induction of FRET from ECFP to Ypet. It has been confirmed that the Erk biosensor can monitor  
31 Fgf-dependent Erk activity in living zebrafish embryos (Sari et al., 2018). One cell stage of

1 embryos were injected mRNA encoding a *FRET-based ERK biosensor* termed *Eevee-ERKnl*  
2 (Sari et al., 2018; Komatsu et al., 2011). The embryos at a certain stage were excited with a 440-  
3 nm laser, and fluorescence spectra were acquired by using a Lambda Scanning mode of a  
4 LSM710 confocal microscope (Zeiss). Using a Linear Unmixing mode, CFP and Ypet signals  
5 were separated from the original spectra data. FRET/CFP ratio images and kymographs were  
6 created with MetaMorph software (Molecular Device).

7

8 **Statistical test.** Significance was calculated by one-tailed Student's t tests, using Excel  
9 (Microsoft). Unequal variance comparison was performed for Fig. 1D, Fig. 2 B and C, and equal  
10 variance comparison was performed for Fig. 5D and Fig. 6K.

11

## 12 **Wavelet transform**

13 We follow the approach of (Soroldoni et al., 2014) and use the wavelet transform to generate  
14 phase maps for *her1* along the embryo. Consider that the *her1* pattern is of the form:

$$15 \quad h(x) = h_0 + A(x) \sin(\phi(x) + \Phi)$$

16 i.e. has a spatially varying amplitude,  $A(x)$  and a spatially varying phase,  $\phi(x)$ . By performing a  
17 wavelet transform we can convert the intensity profile  $h(x)$  into an effective phase profile  $\phi(x)$ ,  
18 plotted in Fig. 3E. Note, we plot the phase for positions more anterior than the first clear peak  
19 since it is only in these ranges where there is a distinct spatial pattern above noise, and, in all  
20 cases, contains the position at which the next somite boundary is specified i.e. B-4. We also  
21 measured the phase gradient manually, by identifying peaks and troughs in the intensity profile  
22 (separated by  $\pi$ ). This manual measurement (orange triangles in Fig. 3E) was found to well  
23 match the corresponding phases as obtained from the wavelet transform, giving us confidence in  
24 our implementation. For further details of the wavelet transform, we refer the reader to  
25 (Soroldoni et al., 2014).

26

## 27 **Acknowledgments**

28 We thank O. Pourquié, A. Aulehla and A. Oates for critical discussion. Some images were taken  
29 at Nikon Imaging Center at Harvard Medical School. K.I. acknowledges a Postdoctoral  
30 Fellowship for Research Abroad (Japan Society for Promotion of Science).

31

## 1 **Competing interest**

2 The authors declare no competing or financial interests.

3

## 4 **Author contributions**

5 K.I. conceived the study and conducted experiments and data analysis. T.H. did modeling,  
6 simulations and wrote the program for wavelet analysis. Z.C. established size reduction  
7 technique with K.I. D.S., K.L. Y.B. and T.M. established Erk reporter fish and performed live  
8 imaging for this reporter. D.R. helped with image analysis. S.M. supervised the overall study.  
9 K.I., T.H. and S.M. wrote the paper with input from other authors.

10

## 11 **Funding**

12 The work was supported by the PRESTO program (JPMJPR11AA) of the Japan Science and  
13 Technology. This work was partially supported by Grants-in-Aid for Scientific Research from  
14 the Ministry of Education, Culture, Sports, Science and Technology (MEXT), Japan (for Y.B  
15 and T.M) Agency. T.H. was supported by the Herchel Smith Graduate Fellowship.

16

## 17 **References**

- 18 **Akiyama, R., Masuda, M., Tsuge, S., Bessho, Y. and Matsui, T.** (2014). An anterior limit of FGF/Erk signal  
19 activity marks the earliest future somite boundary in zebrafish. *Development* **141**, 1104-9.
- 20 **Ares, S., Morelli, L. G., Jorg, D. J., Oates, A. C. and Julicher, F.** (2012). Collective modes of coupled phase  
21 oscillators with delayed coupling. *Phys Rev Lett* **108**, 204101.
- 22 **Ay, A., Holland, J., Sperlea, A., Devakanmalai, G. S., Knierer, S., Sangervasi, S., Stevenson, A. and Ozbudak,**  
23 **E. M.** (2014). Spatial gradients of protein-level time delays set the pace of the traveling segmentation clock waves.  
24 *Development* **141**, 4158-67.
- 25 **Bajard, L., Morelli, L. G., Ares, S., Pecreaux, J., Julicher, F. and Oates, A. C.** (2014). Wnt-regulated dynamics  
26 of positional information in zebrafish somitogenesis. *Development* **141**, 1381-91.
- 27 **Baker, R. E., Schnell, S. and Maini, P. K.** (2006). A clock and wavefront mechanism for somite formation. *Dev*  
28 *Biol* **293**, 116-26.
- 29 **Ben-Zvi, D. and Barkai, N.** (2010). Scaling of morphogen gradients by an expansion-repression integral feedback  
30 control. *Proc Natl Acad Sci U S A* **107**, 6924-9.
- 31 **Cooke, J.** (1975). Control of somite number during morphogenesis of a vertebrate, *Xenopus laevis*. *Nature* **254**,  
32 196-9.
- 33 **Cooke, J.** (1981). Scale of body pattern adjusts to available cell number in amphibian embryos. *Nature* **290**, 775-8.
- 34 **Cooke, J. and Zeeman, E. C.** (1976). A clock and wavefront model for control of the number of repeated structures  
35 during animal morphogenesis. *J Theor Biol* **58**, 455-76.
- 36 **Cotterell, J., Robert-Moreno, A. and Sharpe, J.** (2015). A Local, Self-Organizing Reaction-Diffusion Model Can  
37 Explain Somite Patterning in Embryos. *Cell Syst* **1**, 257-69.
- 38 **Delaune, E. A., Francois, P., Shih, N. P. and Amacher, S. L.** (2012). Single-cell-resolution imaging of the impact  
39 of Notch signaling and mitosis on segmentation clock dynamics. *Dev Cell* **23**, 995-1005.
- 40 **Dequeant, M. L., Glynn, E., Gaudenz, K., Wahl, M., Chen, J., Mushegian, A. and Pourquie, O.** (2006). A  
41 complex oscillating network of signaling genes underlies the mouse segmentation clock. *Science* **314**, 1595-8.
- 42 **Diez del Corral, R., Olivera-Martinez, I., Goriely, A., Gale, E., Maden, M. and Storey, K.** (2003). Opposing

- 1 FGF and retinoid pathways control ventral neural pattern, neuronal differentiation, and segmentation during body  
2 axis extension. *Neuron* **40**, 65-79.
- 3 **Dini Wahyu Kartika Sari, R. A., Honda Naoki, Hannosuke Ishijima, Yasumasa Bessho, and Takaaki Matsui.**  
4 (2018). Time-lapse observation of stepwise regression of Erk activity in zebrafish presomitic mesoderm. *Scientific*  
5 *Reports* **8**.
- 6 **Dubrulle, J., McGrew, M. J. and Pourquie, O.** (2001). FGF signaling controls somite boundary position and  
7 regulates segmentation clock control of spatiotemporal Hox gene activation. *Cell* **106**, 219-32.
- 8 **Dubrulle, J. and Pourquie, O.** (2004). fgf8 mRNA decay establishes a gradient that couples axial elongation to  
9 patterning in the vertebrate embryo. *Nature* **427**, 419-22.
- 10 **Elsdale, T., Pearson, M. and Whitehead, M.** (1976). Abnormalities in somite segmentation following heat shock  
11 to *Xenopus* embryos. *J Embryol Exp Morphol* **35**, 625-35.
- 12 **Giudicelli, F., Ozbudak, E. M., Wright, G. J. and Lewis, J.** (2007). Setting the tempo in development: an  
13 investigation of the zebrafish somite clock mechanism. *PLoS Biol* **5**, e150.
- 14 **Gomez, C., Ozbudak, E. M., Wunderlich, J., Baumann, D., Lewis, J. and Pourquie, O.** (2008). Control of  
15 segment number in vertebrate embryos. *Nature* **454**, 335-9.
- 16 **Goudevenou, K., Martin, P., Yeh, Y. J., Jones, P. and Sablitzky, F.** (2011). Def6 is required for convergent  
17 extension movements during zebrafish gastrulation downstream of Wnt5b signaling. *PLoS One* **6**, e26548.
- 18 **Gregor, T., Bialek, W., de Ruyter van Steveninck, R. R., Tank, D. W. and Wieschaus, E. F.** (2005). Diffusion  
19 and scaling during early embryonic pattern formation. *Proc Natl Acad Sci U S A* **102**, 18403-7.
- 20 **Gregor, T., McGregor, A. P. and Wieschaus, E. F.** (2008). Shape and function of the Bicoid morphogen gradient  
21 in dipteran species with different sized embryos. *Dev Biol* **316**, 350-8.
- 22 **Gunawardena, J.** (2014). Models in biology: 'accurate descriptions of our pathetic thinking'. *BMC Biol* **12**, 29.
- 23 **Haines, L., Neyt, C., Gautier, P., Keenan, D. G., Bryson-Richardson, R. J., Hollway, G. E., Cole, N. J. and**  
24 **Currie, P. D.** (2004). Met and Hgf signaling controls hypaxial muscle and lateral line development in the zebrafish.  
25 *Development* **131**, 4857-69.
- 26 **Herrgen, L., Ares, S., Morelli, L. G., Schroter, C., Julicher, F. and Oates, A. C.** (2010). Intercellular coupling  
27 regulates the period of the segmentation clock. *Curr Biol* **20**, 1244-53.
- 28 **Holley, S. A., Geisler, R. and Nusslein-Volhard, C.** (2000). Control of her1 expression during zebrafish  
29 somitogenesis by a delta-dependent oscillator and an independent wave-front activity. *Genes Dev* **14**, 1678-90.
- 30 **Howard, M. and ten Wolde, P. R.** (2005). Finding the center reliably: robust patterns of developmental gene  
31 expression. *Phys Rev Lett* **95**, 208103.
- 32 **Hubaud, A. and Pourquie, O.** (2014). Signalling dynamics in vertebrate segmentation. *Nat Rev Mol Cell Biol* **15**,  
33 709-21.
- 34 **Inomata, H., Shibata, T., Haraguchi, T. and Sasai, Y.** (2013). Scaling of dorsal-ventral patterning by embryo  
35 size-dependent degradation of Spemann's organizer signals. *Cell* **153**, 1296-311.
- 36 **Jorg, D. J., Morelli, L. G., Soroldoni, D., Oates, A. C. and Julicher, F.** (2015). Continuum theory of gene  
37 expression waves during vertebrate segmentation. *New J Phys* **17**, 093042.
- 38 **Jorg, D. J., Oates, A. C. and Julicher, F.** (2016). Sequential pattern formation governed by signaling gradients.  
39 *Phys Biol* **13**, 05LT03.
- 40 **Kawanishi, T., Kaneko, T., Moriyama, Y., Kinoshita, M., Yokoi, H., Suzuki, T., Shimada, A. and Takeda, H.**  
41 (2013). Modular development of the teleost trunk along the dorsoventral axis and *zic1/zic4* as selector genes in the  
42 dorsal module. *Development* **140**, 1486-96.
- 43 **Kim, W., Matsui, T., Yamao, M., Ishibashi, M., Tamada, K., Takumi, T., Kohno, K., Oba, S., Ishii, S.,**  
44 **Sakumura, Y. et al.** (2011). The period of the somite segmentation clock is sensitive to Notch activity. *Mol Biol*  
45 *Cell* **22**, 3541-9.
- 46 **Komatsu, N., Aoki, K., Yamada, M., Yukinaga, H., Fujita, Y., Kamioka, Y. and Matsuda, M.** (2011).  
47 Development of an optimized backbone of FRET biosensors for kinases and GTPases. *Mol Biol Cell* **22**, 4647-56.
- 48 **Krol, A. J., Roellig, D., Dequeant, M. L., Tassy, O., Glynn, E., Hattem, G., Mushegian, A., Oates, A. C. and**  
49 **Pourquie, O.** (2011). Evolutionary plasticity of segmentation clock networks. *Development* **138**, 2783-92.
- 50 **Lander, A. D., Nie, Q., Vargas, B. and Wan, F. Y.** (2011). Size-normalized Robustness of Dpp Gradient in  
51 *Drosophila* Wing Imaginal Disc. *J Mech Mater Struct* **6**, 321-350.
- 52 **Lauschke, V. M., Tsiarris, C. D., Francois, P. and Aulehla, A.** (2013). Scaling of embryonic patterning based on  
53 phase-gradient encoding. *Nature* **493**, 101-5.
- 54 **Masamizu, Y., Ohtsuka, T., Takashima, Y., Nagahara, H., Takenaka, Y., Yoshikawa, K., Okamura, H. and**  
55 **Kageyama, R.** (2006). Real-time imaging of the somite segmentation clock: revelation of unstable oscillators in the  
56 individual presomitic mesoderm cells. *Proc Natl Acad Sci U S A* **103**, 1313-8.

- 1 **McHale, P., Rappel, W. J. and Levine, H.** (2006). Embryonic pattern scaling achieved by oppositely directed  
2 morphogen gradients. *Phys Biol* **3**, 107-20.
- 3 **Megason, S. G.** (2009). In toto imaging of embryogenesis with confocal time-lapse microscopy. *Methods Mol Biol*  
4 **546**, 317-32.
- 5 **Morelli, L. G., Ares, S., Herrgen, L., Schroter, C., Julicher, F. and Oates, A. C.** (2009). Delayed coupling theory  
6 of vertebrate segmentation. *Hfsp J* **3**, 55-66.
- 7 **Nikaido, M., Tada, M., Saji, T. and Ueno, N.** (1997). Conservation of BMP signaling in zebrafish mesoderm  
8 patterning. *Mech Dev* **61**, 75-88.
- 9 **O'Connor, M. B., Umulis, D., Othmer, H. G. and Blair, S. S.** (2006). Shaping BMP morphogen gradients in the  
10 *Drosophila* embryo and pupal wing. *Development* **133**, 183-93.
- 11 **Olivera-Martinez, I. and Storey, K. G.** (2007). Wnt signals provide a timing mechanism for the FGF-retinoid  
12 differentiation switch during vertebrate body axis extension. *Development* **134**, 2125-35.
- 13 **Ozbudak, E. M. and Lewis, J.** (2008). Notch signalling synchronizes the zebrafish segmentation clock but is not  
14 needed to create somite boundaries. *PLoS Genet* **4**, e15.
- 15 **Palmeirim, I., Henrique, D., IshHorowicz, D. and Pourquie, O.** (1997). Avian hairy gene expression identifies a  
16 molecular clock linked to vertebrate segmentation and somitogenesis. *Cell* **91**, 639-648.
- 17 **Primmatt, D. R., Norris, W. E., Carlson, G. J., Keynes, R. J. and Stern, C. D.** (1989). Periodic segmental  
18 anomalies induced by heat shock in the chick embryo are associated with the cell cycle. *Development* **105**, 119-30.
- 19 **Primmatt, D. R., Stern, C. D. and Keynes, R. J.** (1988). Heat shock causes repeated segmental anomalies in the  
20 chick embryo. *Development* **104**, 331-9.
- 21 **Rauch, G. J., Hammerschmidt, M., Blader, P., Schauerte, H. E., Strahle, U., Ingham, P. W., McMahon, A. P.  
22 and Haffter, P.** (1997). Wnt5 is required for tail formation in the zebrafish embryo. *Cold Spring Harb Symp Quant*  
23 *Biol* **62**, 227-34.
- 24 **Roy, M. N., Prince, V. E. and Ho, R. K.** (1999). Heat shock produces periodic somitic disturbances in the  
25 zebrafish embryo. *Mech Dev* **85**, 27-34.
- 26 **Saga, Y.** (2012). The synchrony and cyclicity of developmental events. *Cold Spring Harb Perspect Biol* **4**, a008201.
- 27 **Sawada, A., Shinya, M., Jiang, Y. J., Kawakami, A., Kuroiwa, A. and Takeda, H.** (2001). Fgf/MAPK signalling  
28 is a crucial positional cue in somite boundary formation. *Development* **128**, 4873-80.
- 29 **Schindelin, J., Arganda-Carreras, I., Frise, E., Kaynig, V., Longair, M., Pietzsch, T., Preibisch, S., Rueden, C.,  
30 Saalfeld, S., Schmid, B. et al.** (2012). Fiji: an open-source platform for biological-image analysis. *Nat Methods* **9**,  
31 676-82.
- 32 **Schroter, C., Herrgen, L., Cardona, A., Brouhard, G. J., Feldman, B. and Oates, A. C.** (2008). Dynamics of  
33 zebrafish somitogenesis. *Dev Dyn* **237**, 545-53.
- 34 **Schroter, C. and Oates, A. C.** (2010). Segment number and axial identity in a segmentation clock period mutant.  
35 *Curr Biol* **20**, 1254-8.
- 36 **Shih, N. P., Francois, P., Delaune, E. A. and Amacher, S. L.** (2015). Dynamics of the slowing segmentation clock  
37 reveal alternating two-segment periodicity. *Development* **142**, 1785-93.
- 38 **Soroldoni, D., Jorg, D. J., Morelli, L. G., Richmond, D. L., Schindelin, J., Julicher, F. and Oates, A. C.** (2014).  
39 Genetic oscillations. A Doppler effect in embryonic pattern formation. *Science* **345**, 222-5.
- 40 **Soza-Ried, C., Ozturk, E., Ish-Horowicz, D. and Lewis, J.** (2014). Pulses of Notch activation synchronise  
41 oscillating somite cells and entrain the zebrafish segmentation clock. *Development* **141**, 1780-8.
- 42 **Steventon, B., Duarte, F., Lagadec, R., Mazan, S., Nicolas, J. F. and Hirsinger, E.** (2016). Species-specific  
43 contribution of volumetric growth and tissue convergence to posterior body elongation in vertebrates. *Development*  
44 **143**, 1732-41.
- 45 **Stulberg, M. J., Lin, A., Zhao, H. and Holley, S. A.** (2012). Crosstalk between Fgf and Wnt signaling in the  
46 zebrafish tailbud. *Dev Biol* **369**, 298-307.
- 47 **Takahashi, J., Ohbayashi, A., Oginuma, M., Saito, D., Mochizuki, A., Saga, Y. and Takada, S.** (2010).  
48 Analysis of Ripply1/2-deficient mouse embryos reveals a mechanism underlying the rostro-caudal patterning within  
49 a somite. *Dev Biol* **342**, 134-45.
- 50 **Thorpe, C. J., Weidinger, G. and Moon, R. T.** (2005). Wnt/beta-catenin regulation of the Sp1-related transcription  
51 factor sp51 promotes tail development in zebrafish. *Development* **132**, 1763-72.
- 52 **Tsiairis, C. D. and Aulehla, A.** (2016). Self-Organization of Embryonic Genetic Oscillators into Spatiotemporal  
53 Wave Patterns. *Cell* **164**, 656-67.
- 54 **Umulis, D. M. and Othmer, H. G.** (2013). Mechanisms of scaling in pattern formation. *Development* **140**, 4830-43.
- 55 **Uriu, K., Morishita, Y. and Iwasa, Y.** (2009). Traveling wave formation in vertebrate segmentation. *J Theor Biol*  
56 **257**, 385-96.

- 1 **Wahl, M. B., Deng, C., Lewandoski, M. and Pourquie, O.** (2007). FGF signaling acts upstream of the NOTCH
- 2 and WNT signaling pathways to control segmentation clock oscillations in mouse somitogenesis. *Development* **134**,
- 3 4033-41.
- 4 **Westerfield, M.** (2000). The zebrafish book. A guide for the laboratory use of zebrafish (*Danio rerio*). University of
- 5 Oregon Press, Eugene.
- 6
- 7

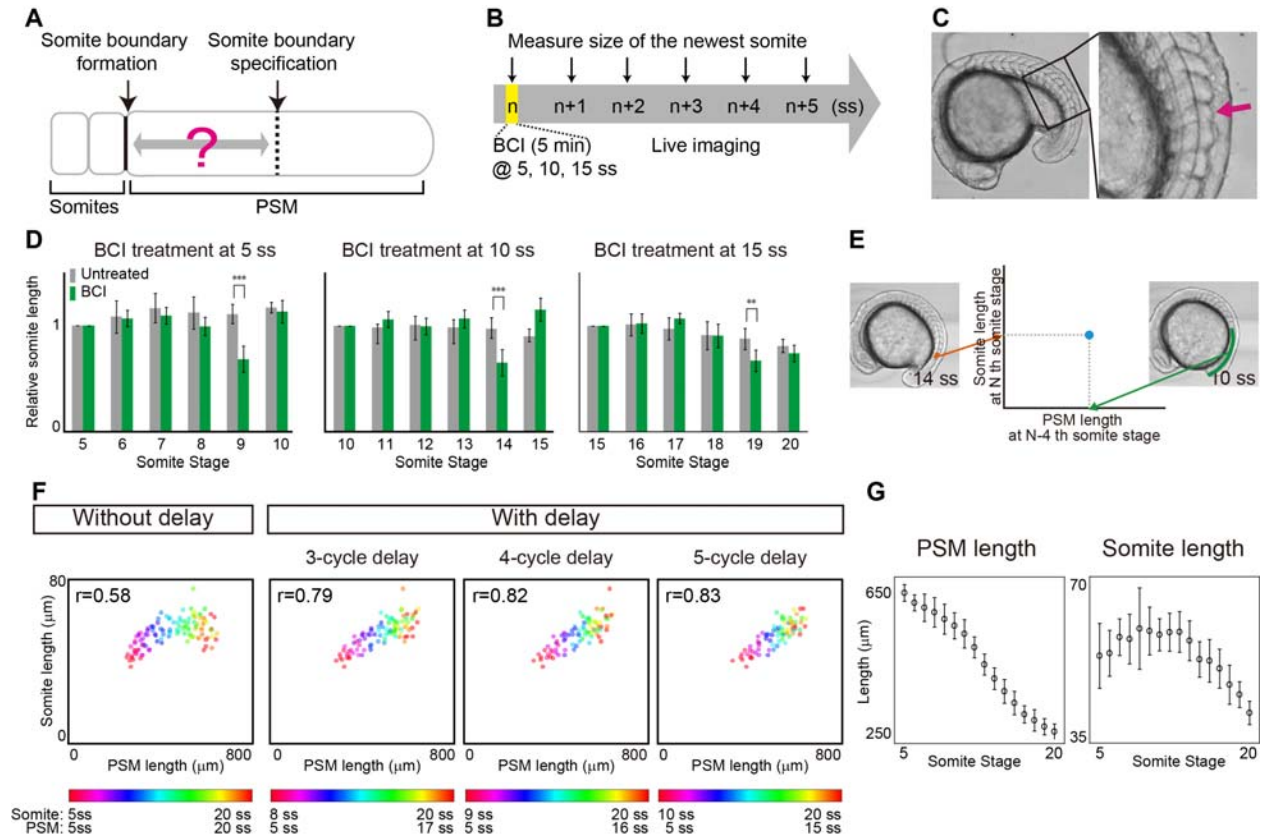

1  
 2 **Fig. 1. Somite scaling over time with time delay.** (A) Schematic illustration of time delay  
 3 between somite boundary specification and somite boundary formation. (B) Schematic  
 4 illustration of BCI experiment. The embryos were treated with BCI for 5 min and then subjected  
 5 to live imaging in egg water without BCI. The BCI treatment was done at 3 different somite  
 6 stages (5, 10, 15 ss), in case the delay time varies over time. (C) BCI treated embryos form  
 7 smaller somites (magenta arrow). (D) Relative AP length of somites, normalized by the somite  
 8 length of control embryos at somite stage of BCI treatment. At each somite stage, the smaller  
 9 somite was formed 4 cycles after BCI treatment. Error bars denote s.d.. \*\*P < 0.01 and \*\*\*P <  
 10 0.001. (n=5 for each condition) (E) Comparison of PSM length and somite length was made  
 11 using PSM length at N-4 ss (e.g. 10 ss) and somite length at N ss (e.g. 14 ss), using live imaging  
 12 data. (F) Somite size vs PSM size at different somite stages with and without time delay (3, 4, 5  
 13 cycles). (G) Size dynamics of PSM and somites. Note the peaks appear at different somite stages.  
 14 Error bars denote s.d.

15



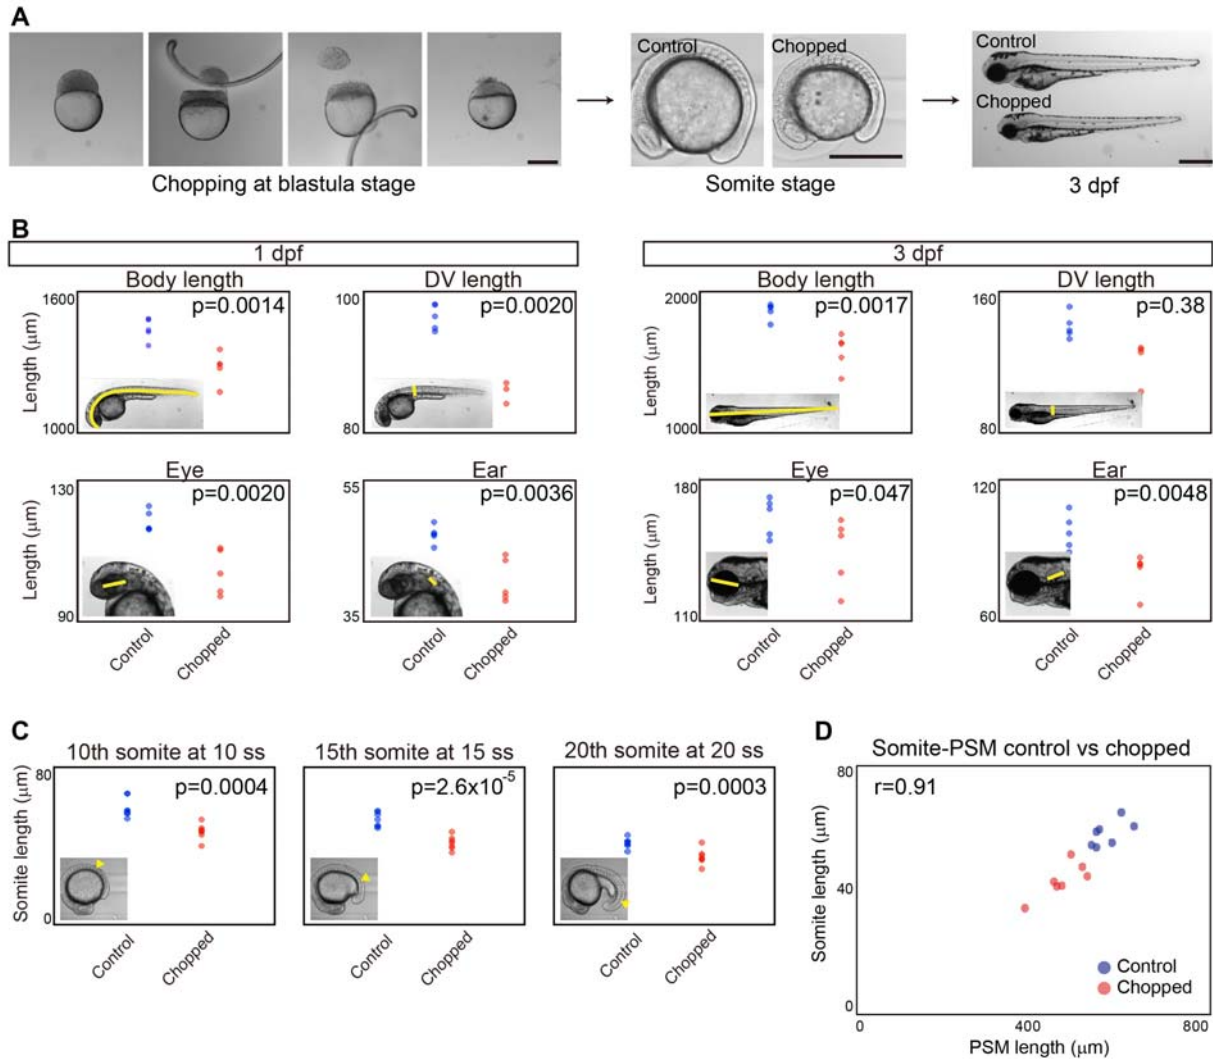

1  
2 **Fig. 2. Somite scaling between individuals of different sizes.** (A) Size reduction technique.  
3 Scale bar, 500  $\mu\text{m}$ . (B) Body and organ sizes comparison between control and chopped embryos.  
4 (C) Somite size comparison between control and chopped embryos. (D) Somite size vs PSM size  
5 between control and chopped embryos.  
6

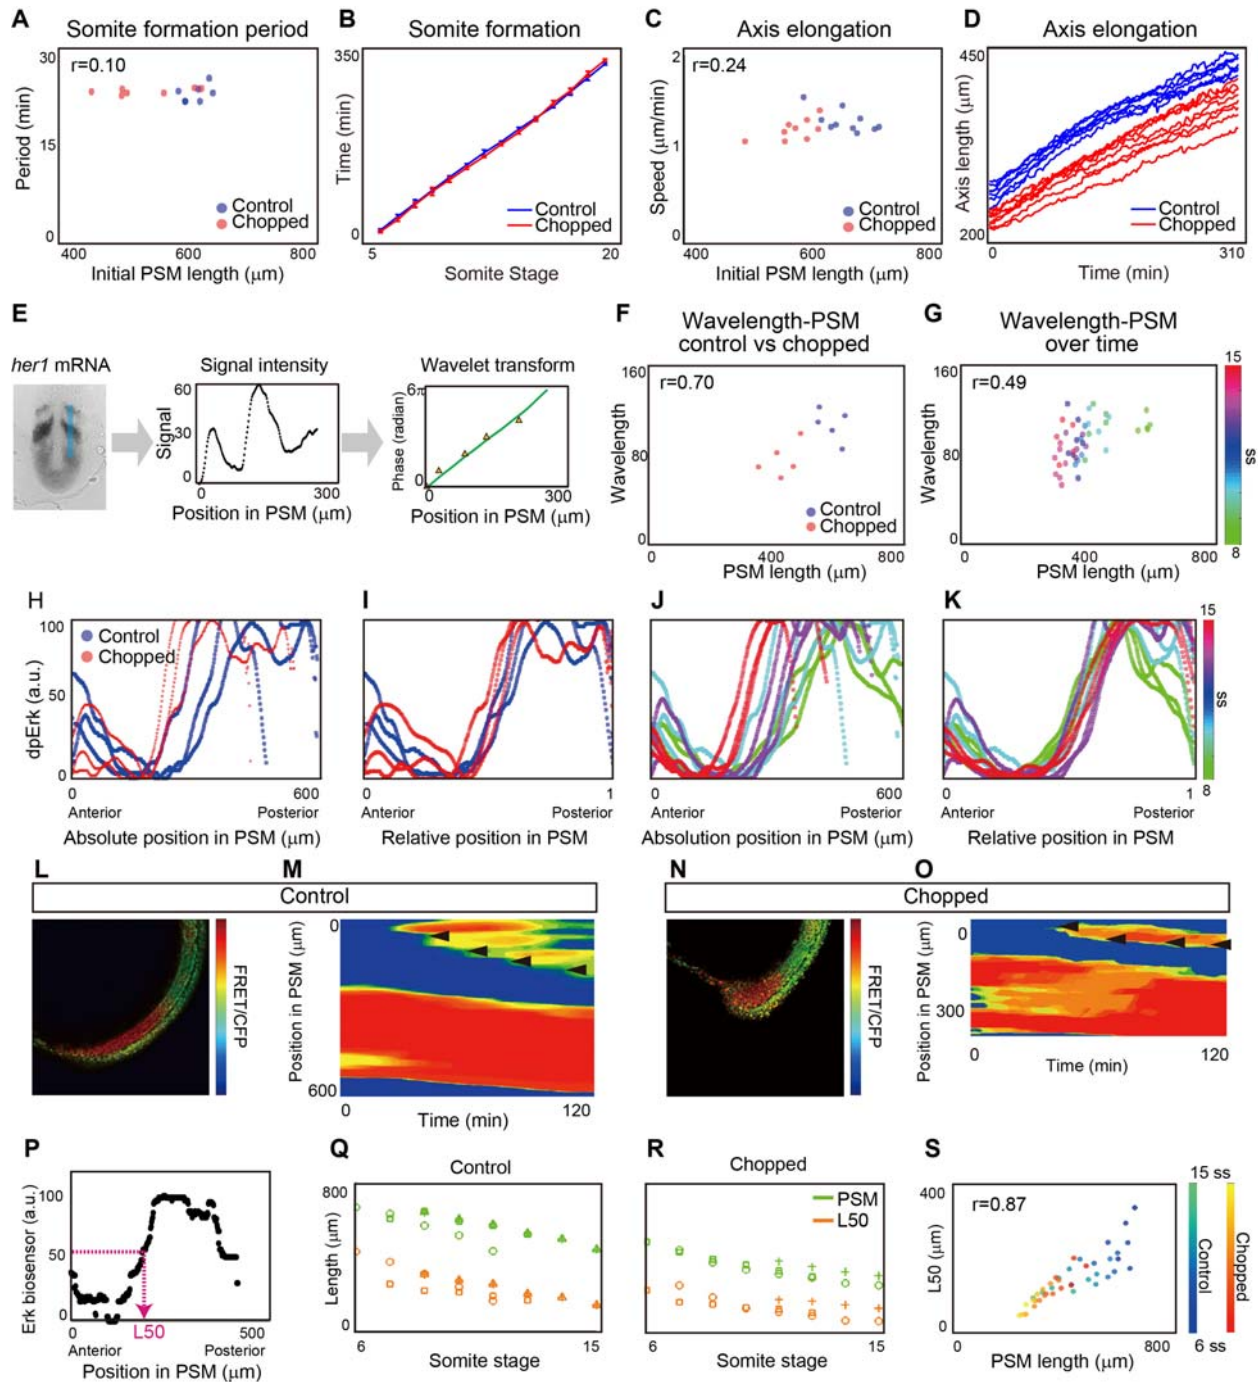

1  
 2 **Fig. 3 Determining which components of the somite formation system scale.** (A) Somite  
 3 formation frequency vs. initial PSM size. No significant difference was found between control  
 4 and chopped embryos at the 5% significance level, and the confidence interval on the difference  
 5 of means (-1.78 - 0.66) includes the hypothesized value of 0. (B) Somite formation time of  
 6 control and chopped embryos. The slope corresponds to somite formation period. Note the slopes  
 7 do not change over time. Error bars denote s.d. (C) Axis elongation speed vs. PSM size. No

1 significant difference was found between control and chopped embryos at the 5% significance  
2 level, and the confidence interval on the difference of means (-0.10 - 0.15) includes the  
3 hypothesized value of 0. **(D)**. Axis length vs. time. The slope represents the speed of axis  
4 elongation. **(E)** Quantification of *her1* wavelength along the blue line in the first panel. Green  
5 line in the third panel shows the phase gradient obtained by wavelet transform. Orange triangles  
6 show manually measured wavelength. **(F)** Wavelength vs. PSM among individuals. **(G)**  
7 Wavelength vs. PSM size over time. **(H to K)** Quantification of Fgf activity based on dpErk  
8 immunostaining. **(H and I)** dpErk scaling between control and chopped embryos. **(J and K)**  
9 dpErk scaling across developmental stages. Both are shown by absolute position **(H and J)**, and  
10 relative position **(I and K)**. **(L to S)** Quantification of Fgf activity based on Erk biosensor  
11 mRNA-injected embryos. The manipulated embryos **(L and N)** were used to generate  
12 kymographs of Erk activity **(M and O)**. Black arrowheads represent newly formed somites. LUT,  
13 high (red) to low (blue) reporter intensity. **(P)** Definition of L50. **(Q and R)** Change in PSM size  
14 and L50 position overtime, in control embryos **(Q)** (n=4) and chopped embryos **(R)** (n=3).  
15 Different marks correspond to different embryos. **(S)** L50 vs PSM length over time both in  
16 control and chopped embryos.

17

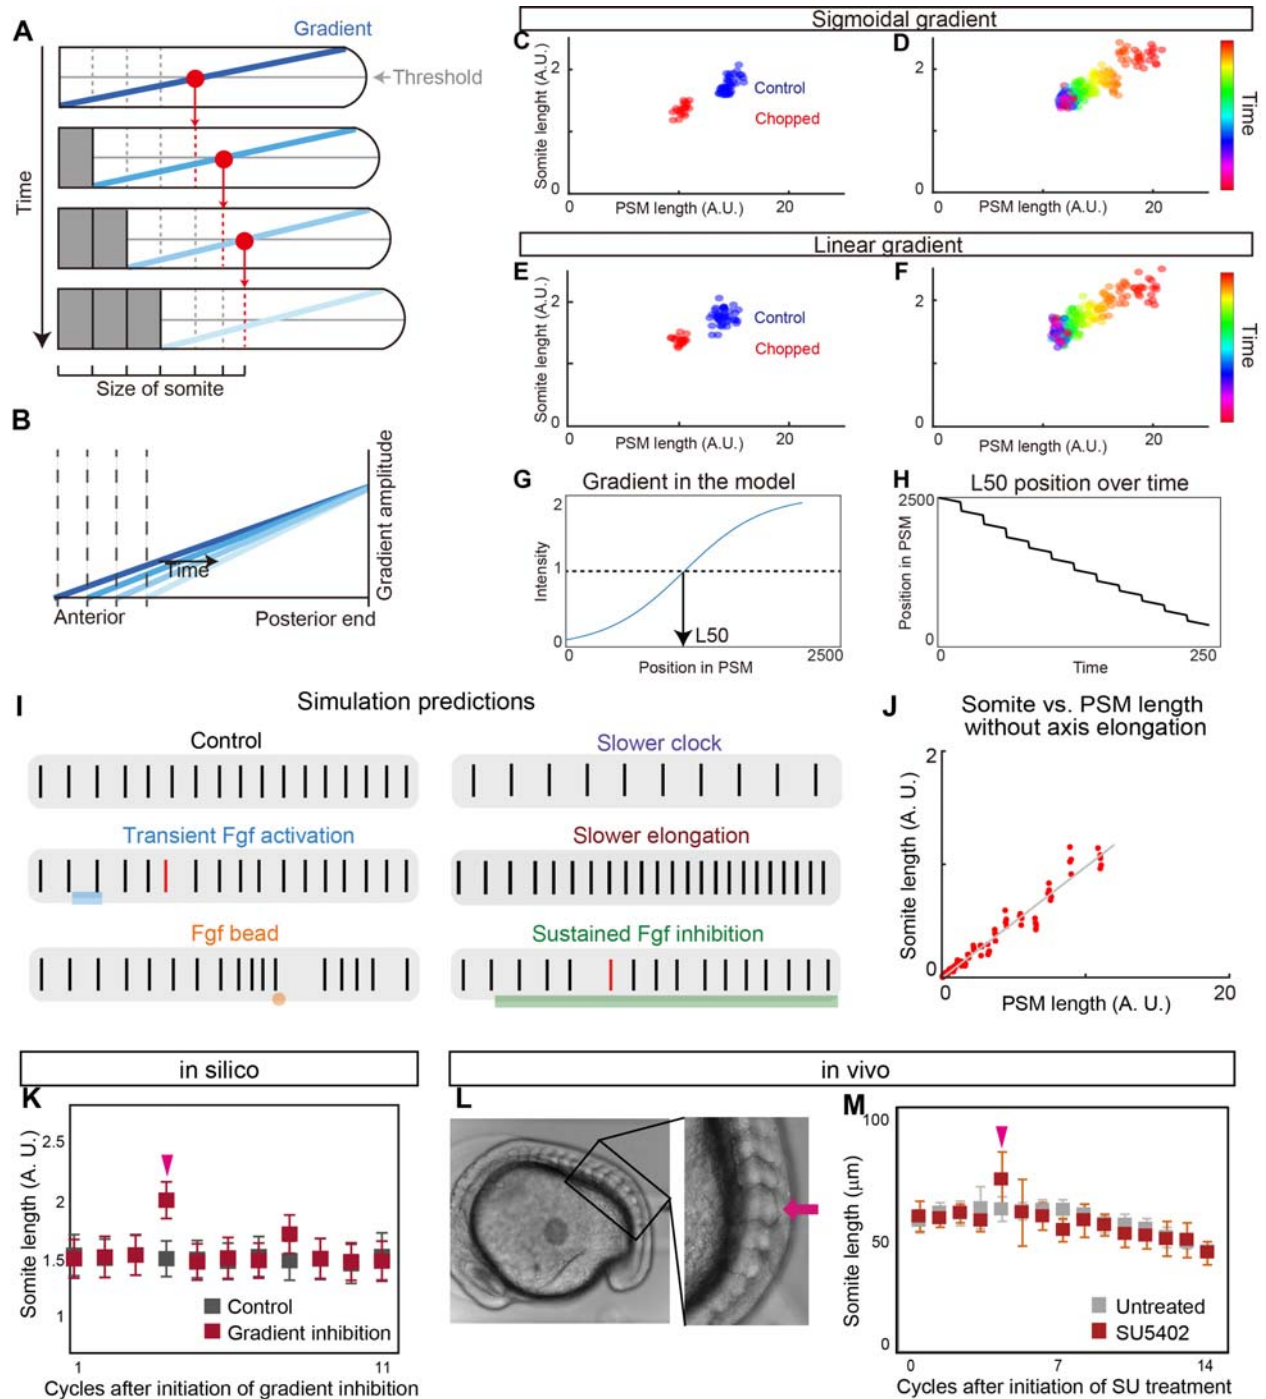

1  
2 **Fig. 4. Clock and scaled gradient model.** (A) Schematic illustration of the clock and scaled  
3 gradient model. (B) Superimposition of the gradients from each time point in (A). (C and D)  
4 Simulation results using a sigmoidal gradient. (E and F) Simulation results using a linear  
5 gradient. (C and E) Simulation results of control and chopped embryos. (D and F) Simulation  
6 results of a single embryo over time. (G and H) Stepwise regression of the gradient in clock and  
7 scaled gradient model. (G) L50 in the model was determined similarly to Fig. 3P. (H) Clock and

1 scaled gradient model predicts stepwise regression of L50 position. **(I)** Simulation results for  
2 perturbation experiments for local or global inhibition/ activation of Fgf, slower clock and slower  
3 axis elongation. **(J)** Somite size versus PSM length shows perfect scaling *in silico* when axial  
4 elongation speed is zero, mimicking the results from the *in vitro* mPSM system (Lauschke et al.,  
5 2013). **(K)** Simulation results of long-term suppression of a gradient in the clock and scaled  
6 gradient model. Error bars denote s.d. **(L and M)** Low concentration of SU5402 (16  $\mu$ M) results  
7 in one or two larger somite(s) (n=7 for both SU5402 and untreated). Error bars denote s.d.

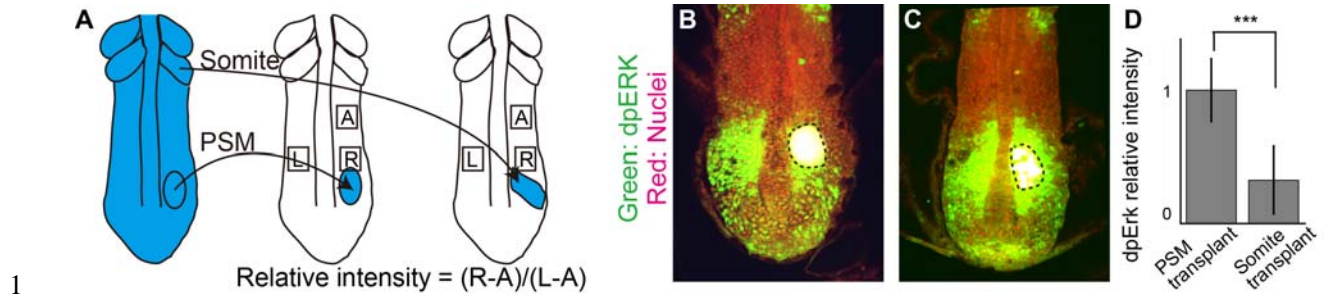

**Fig. 5 New somites inhibit Fgf activity.** (A) Schematic illustration of somite transplantation. (B and C) dpErk immunostaining. Dashed line shows transplanted tissue. (D) Comparison of relative intensities between PSM transplanted samples (n=9) and somite transplanted samples (n=9). Error bars denote s.d. \*\*\*P < 0.001.



1 **Fig. 6 Experimental validation of the clock and scaled gradient model.** (A) Schematic  
2 illustration of the outcome of the clock and scaled gradient model, following induction of one  
3 larger somite. The induced larger somite is colored in magenta, the larger somites as a result of  
4 system response are colored in blue and cyan. (B and C) Simulation results without (B) and with  
5 noise (C) for the somites size (red line in B, red arrow head in C). Blue line in B and blue  
6 arrowhead in C show the second, and cyan line in B and cyan arrowhead in C show the third  
7 large somite. (D) Schematic illustration of the *in vivo* experiment, and an embryo with larger  
8 somites at different time points. (E) Time course of percentage increase in somite length of  
9 SU5402 treated embryos, compared to those in control embryos (n=12). (F) Frequency  
10 distribution of somite cycles between the peaks. (G) Percentage increase in somite size in  
11 SU5402-treated embryos at the peaks detected in each embryo, compared to control embryos at  
12 the corresponding somite stage. In both C and E, blue lines and blue shades indicate the average  
13 somite size and the variance of one standard deviation, respectively. For C, D and E, red, blue  
14 and cyan arrowheads show the first, second and third larger somites. (H-K) Examination of Erk  
15 activity and *her1* wavelength after transient SU5402 treatment. Error bars denote s.d. (H)  
16 Schematic illustration of the experiment. After fixation, the samples were subjected to dpErk  
17 immunostaining and *her1* in situ hybridization. (I) Time course of percentage change in dpErk  
18 maximum intensity in SU5402-treated embryos, compared to those in control embryos. (J) Time  
19 course percentage change in PSM size and L50 position in SU5402-treated embryos, compared  
20 to those in control embryos. Note L50 analysis begins 1.5 hours after SU5402 treatment when  
21 dpErk intensity is recovered (see Fig. 6I) because it cannot be defined earlier. (K) Time course  
22 analysis of *her1* wavelength of untreated embryos and SU5402 treated embryos. We found no  
23 significant difference at significant level of 0.05 at any time point. (L-N) Simulation results for  
24 percentage increase of somite size over time, based on different models. After induction of one  
25 larger somite (arrowheads in magenta), the clock and wavefront model (when wavefront speed is  
26 associated with axis elongation only) predicts one smaller somite (L), wavelength/ Turing model  
27 (Cotterell et al., 2015) predicts smaller somites and the somite size eventually comes back to  
28 normal (M). Only the clock and scaled gradient model predicts the “echo effect” that somite size  
29 dynamics shows ups and downs repeatedly every 4 cycles (N).

30



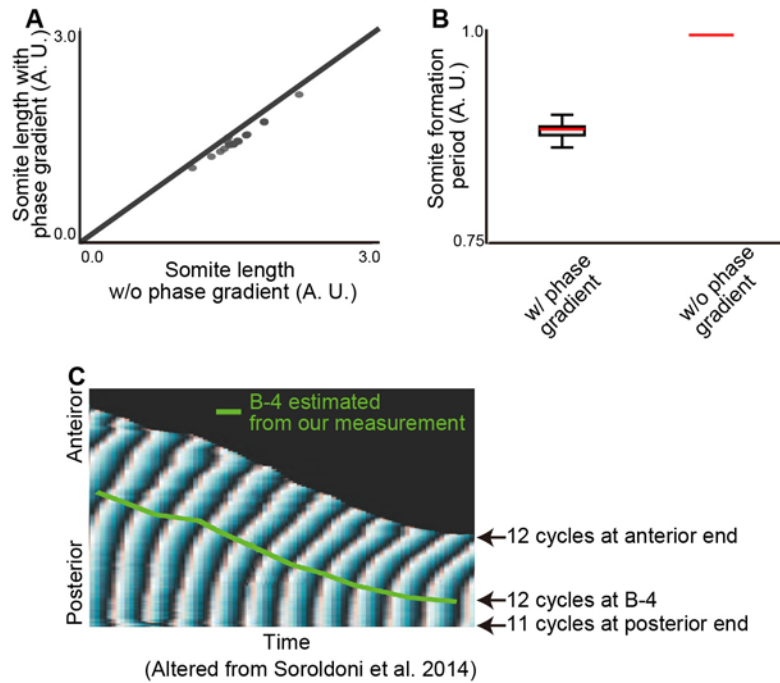

1  
2 **Fig. 7 Traveling waves have modest effects on the clock and scaled gradient model. (A)**  
3 Somite sizes are only slightly changed (~9%) by the presence of a phase gradient. **(B)** The phase  
4 gradient decreased the segmentation period (~11%). Error bars denote s.d. **(C)** B-4 positions  
5 estimated by our measurement are superimposed with the phase map generated previously  
6 (Soroldoni et al., 2014).

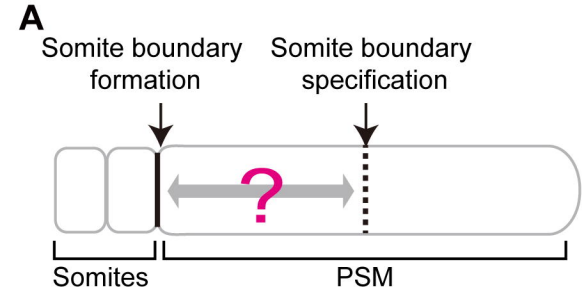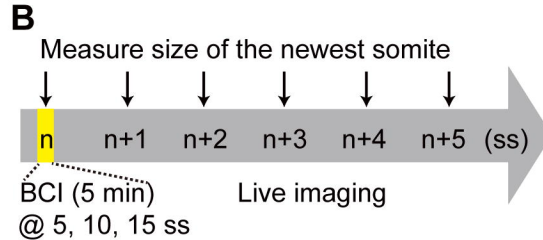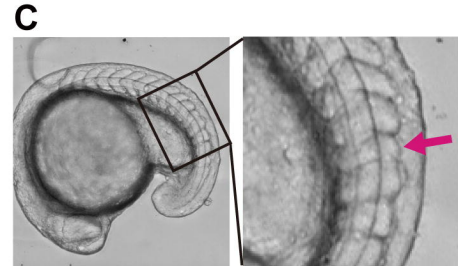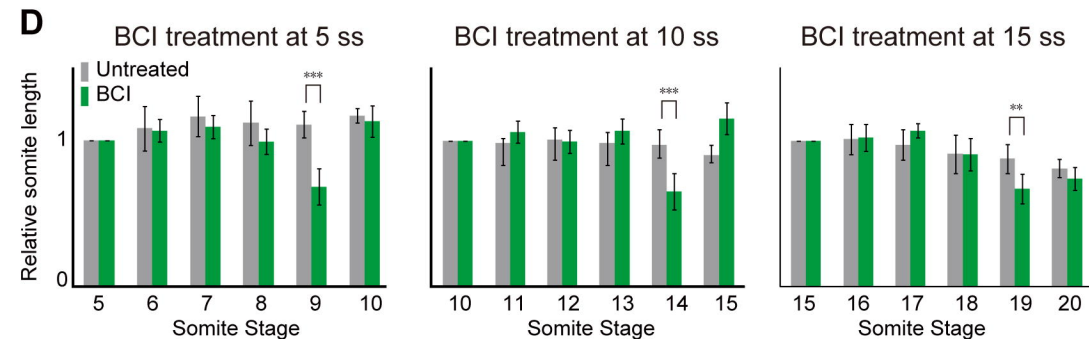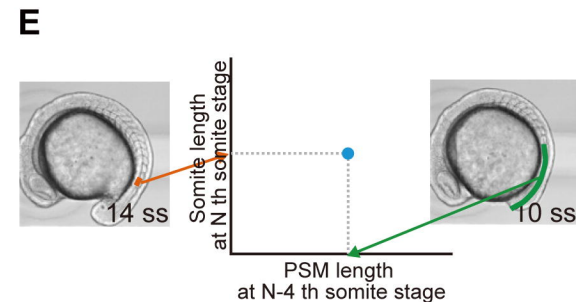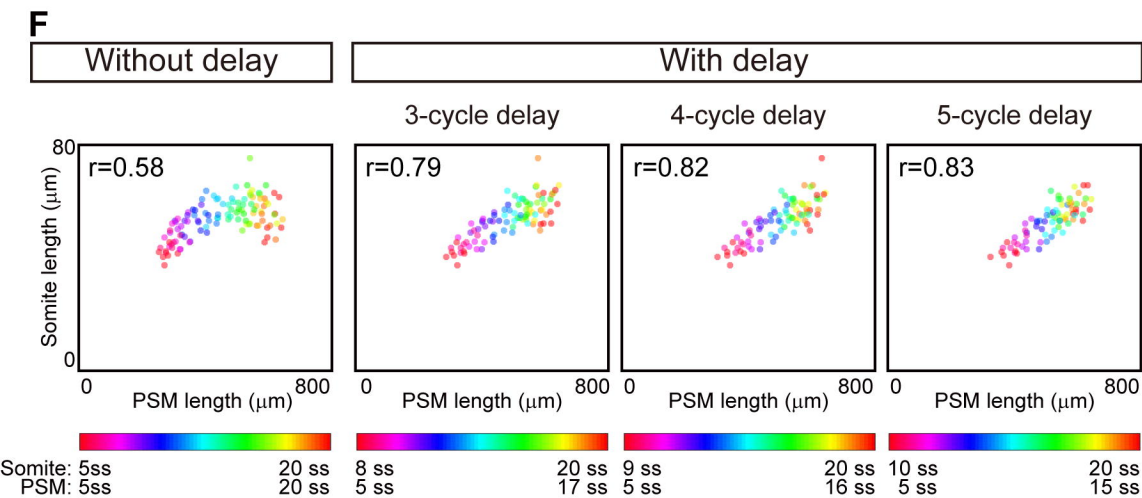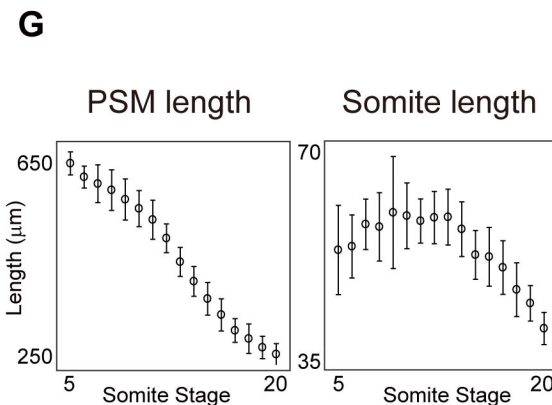

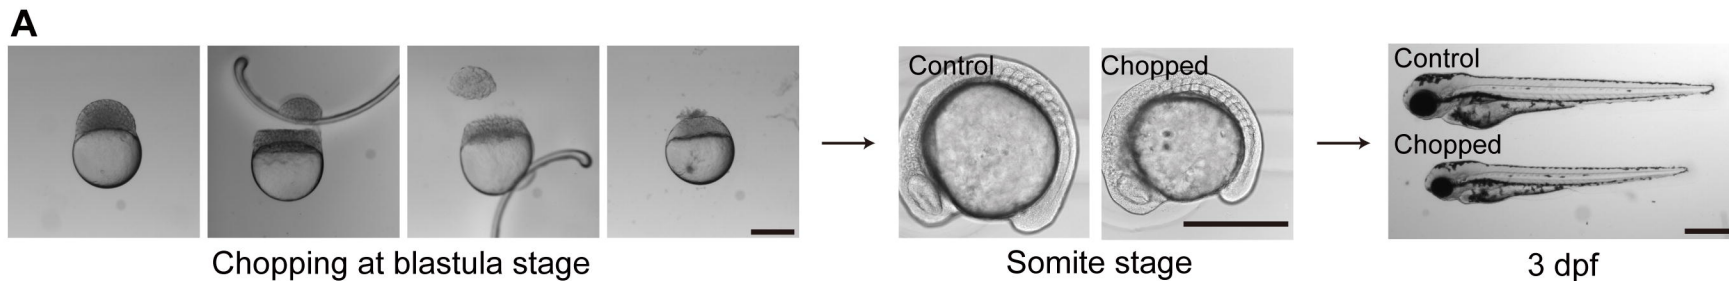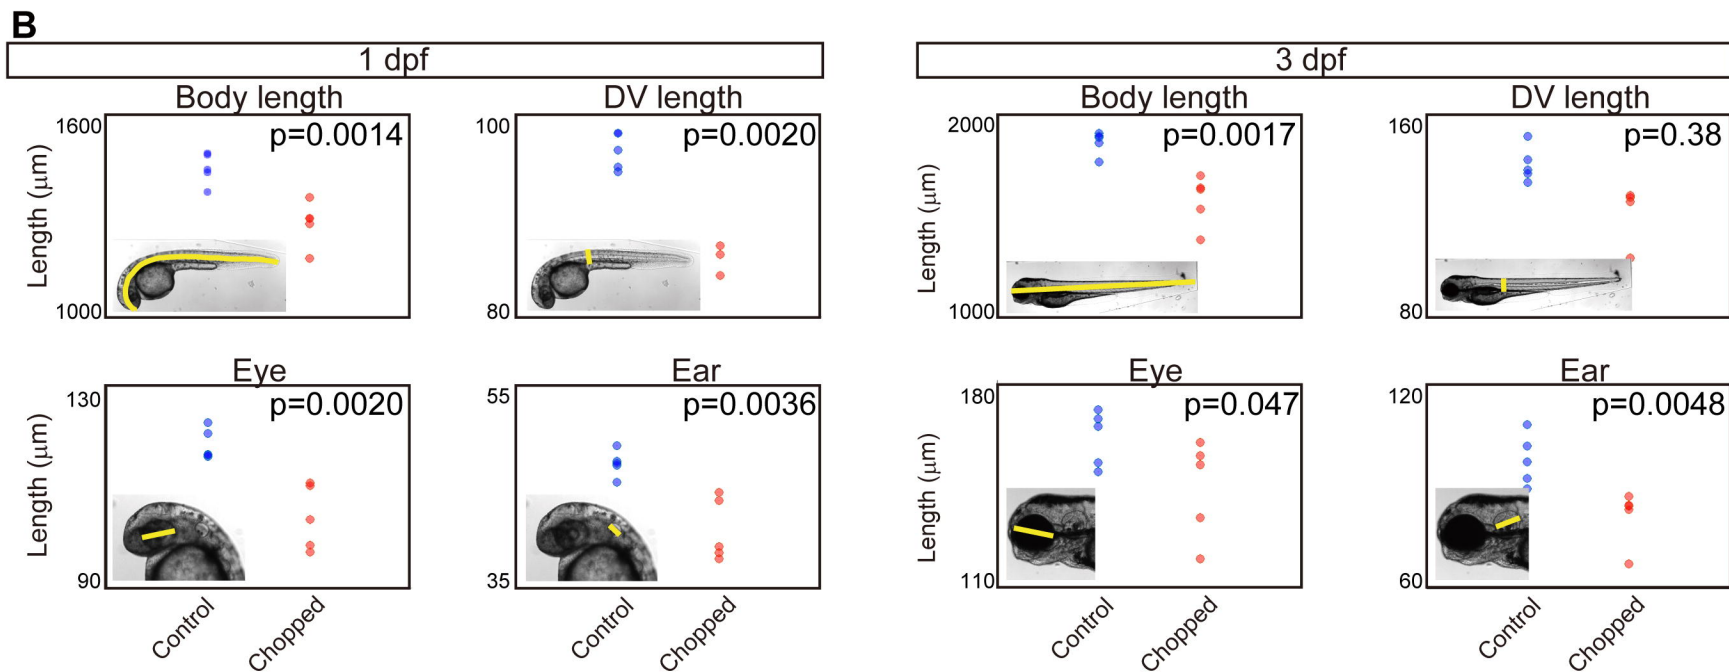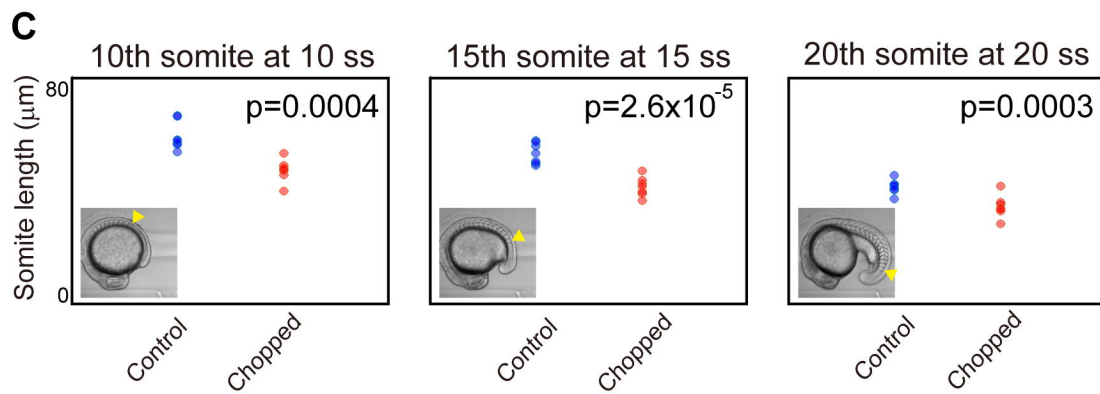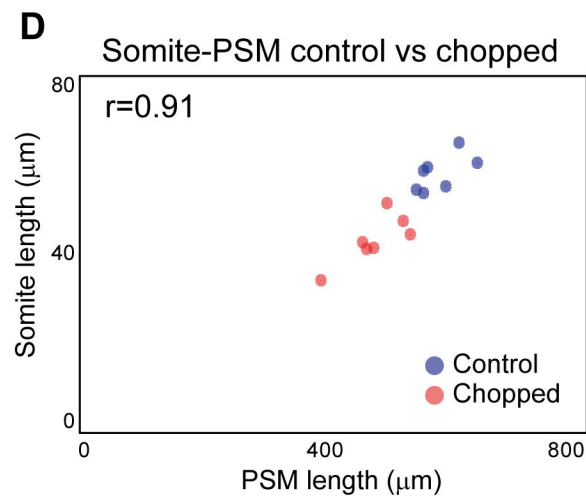

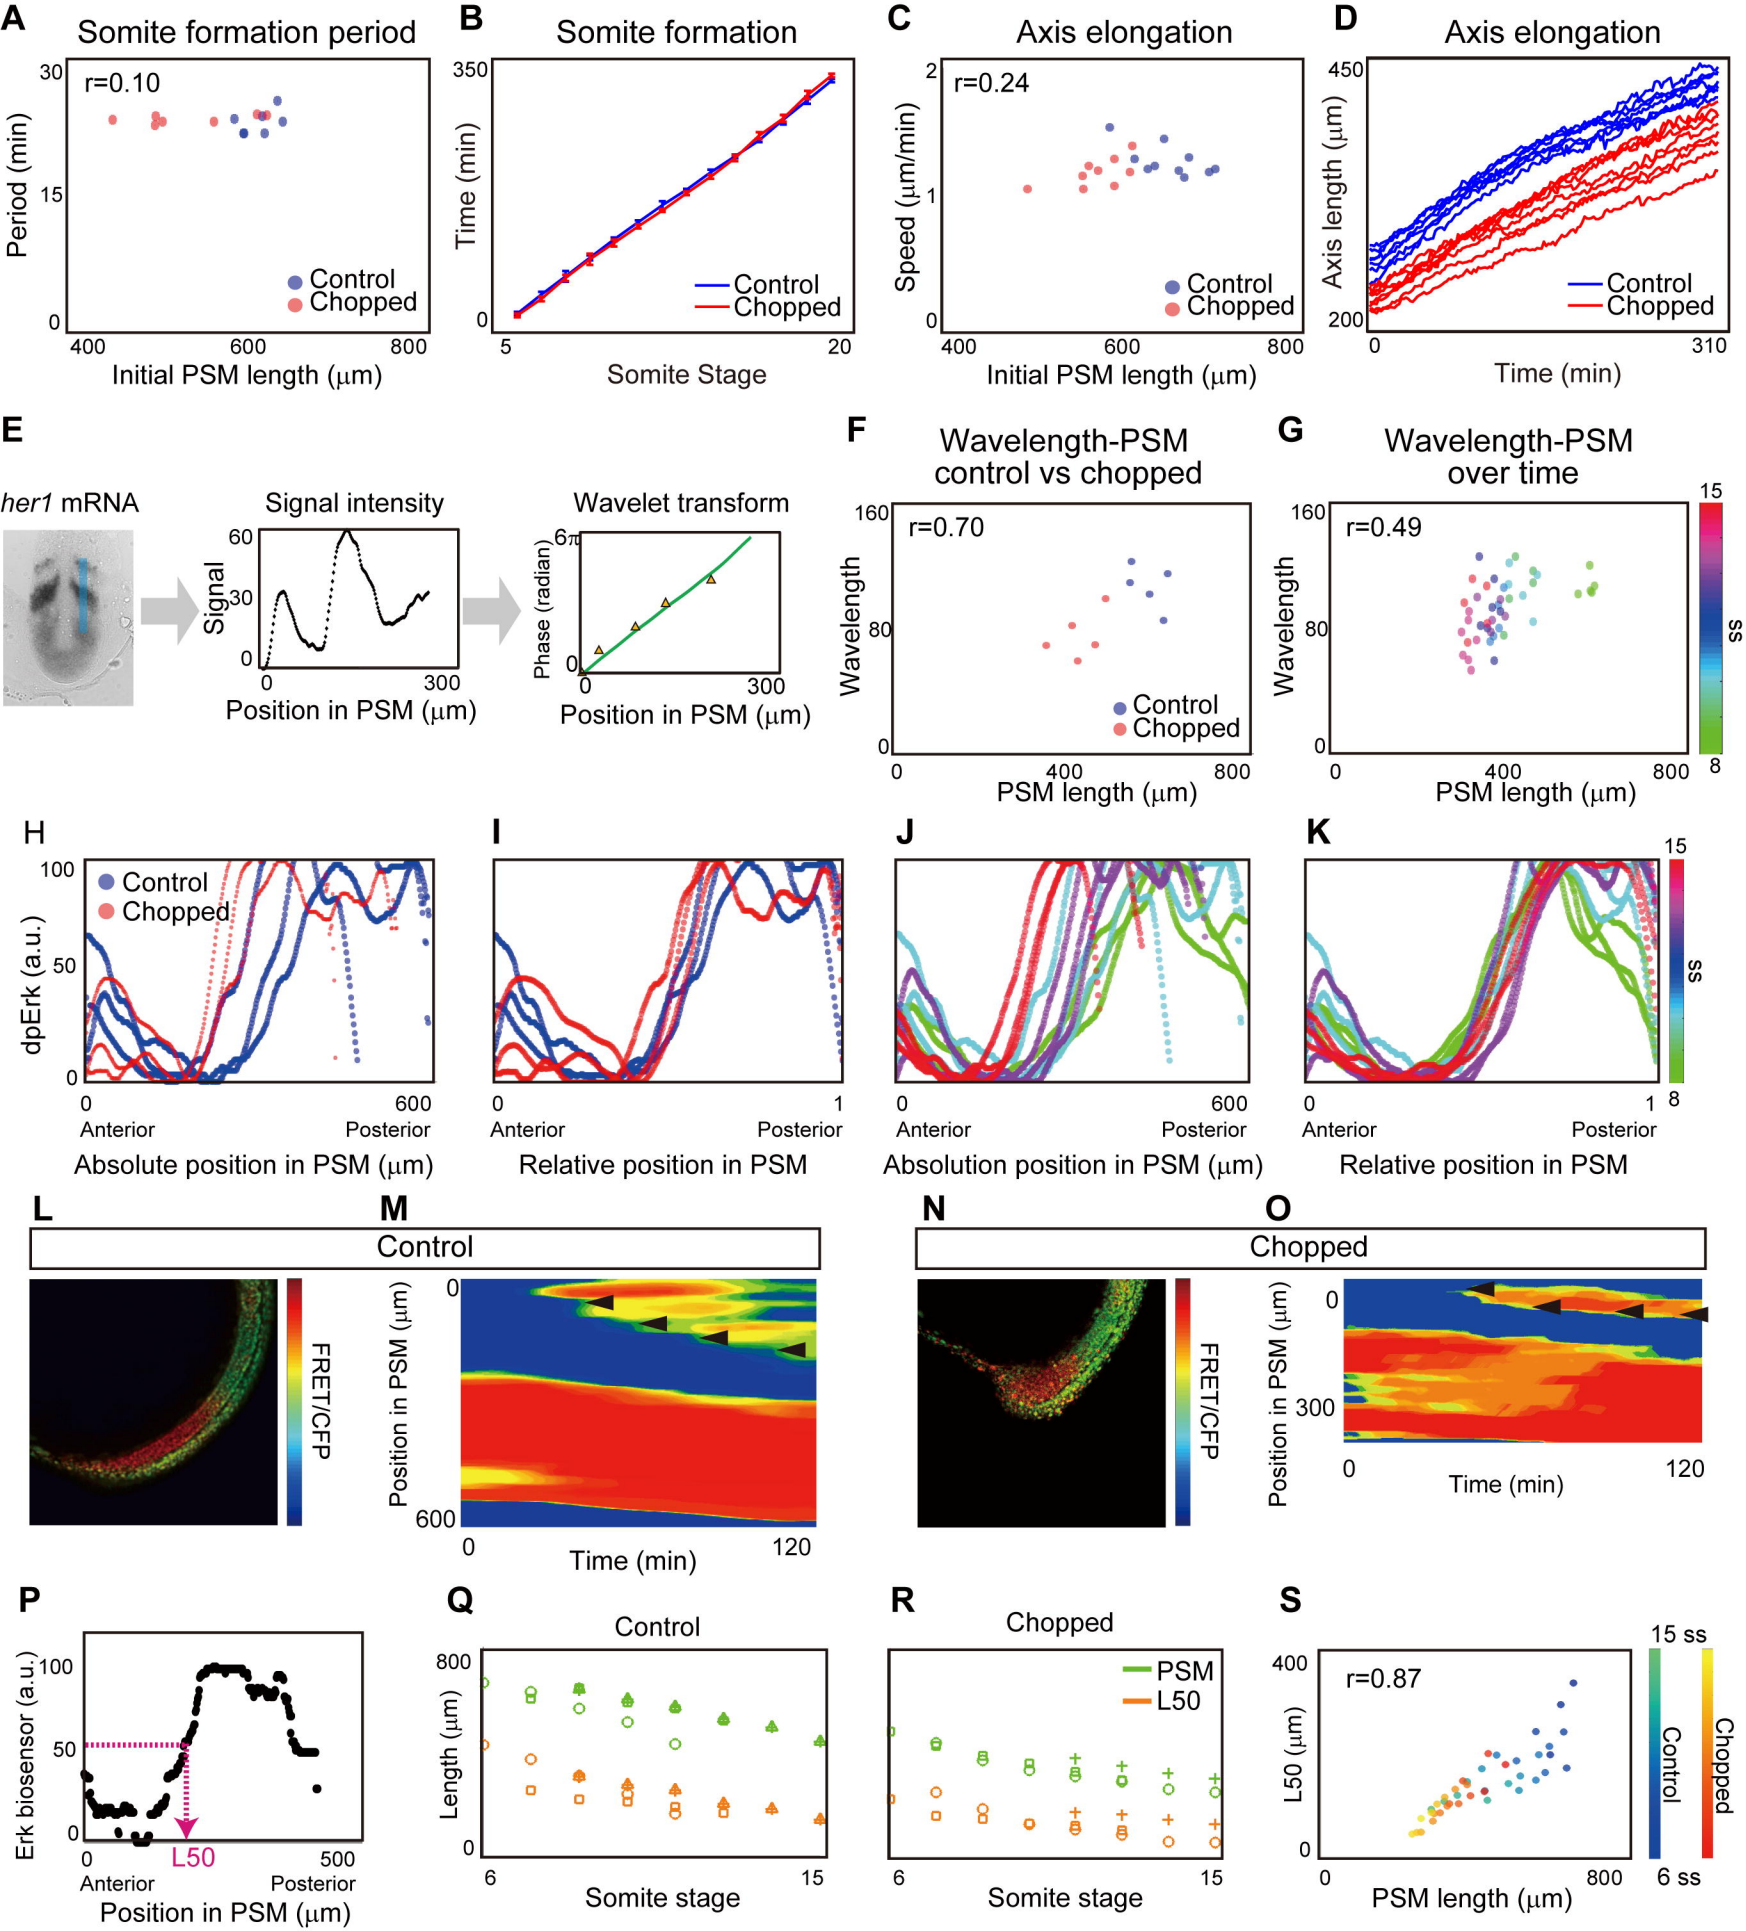

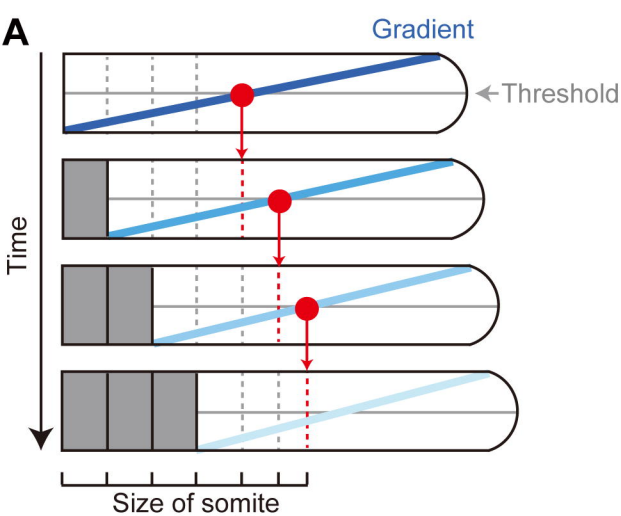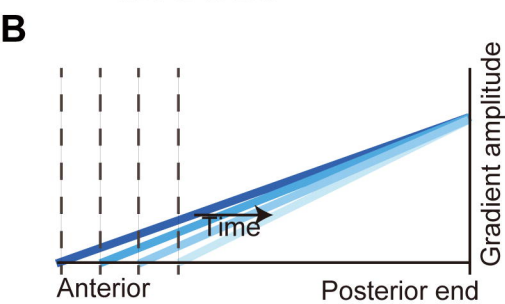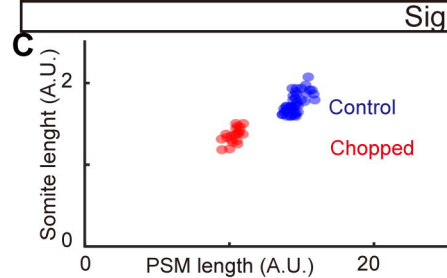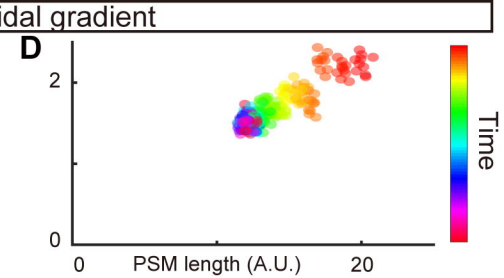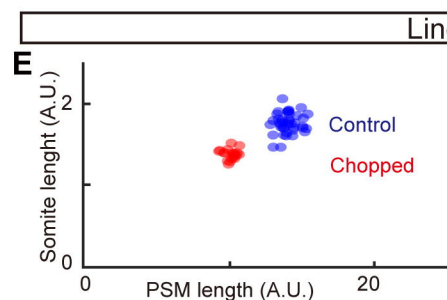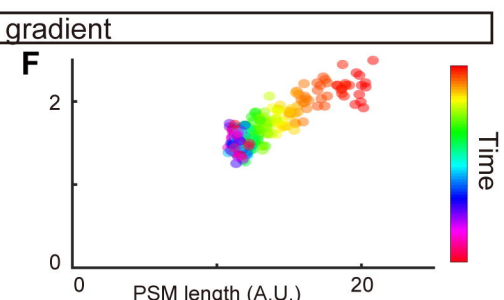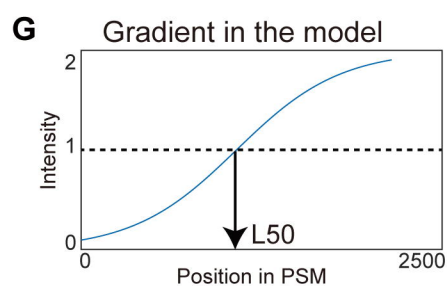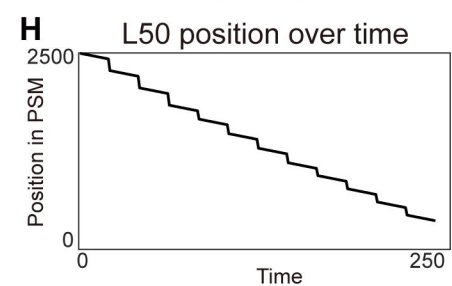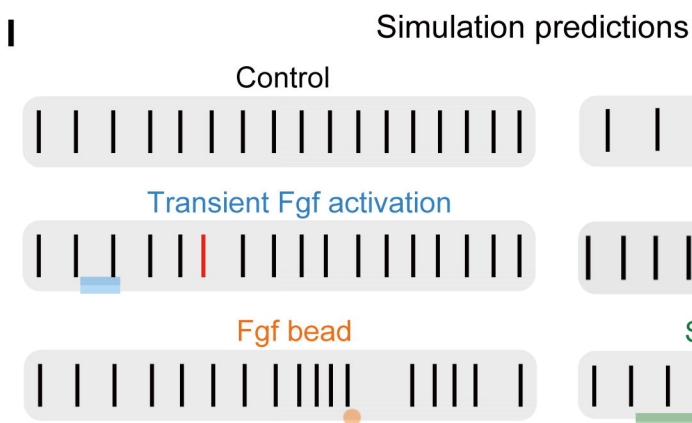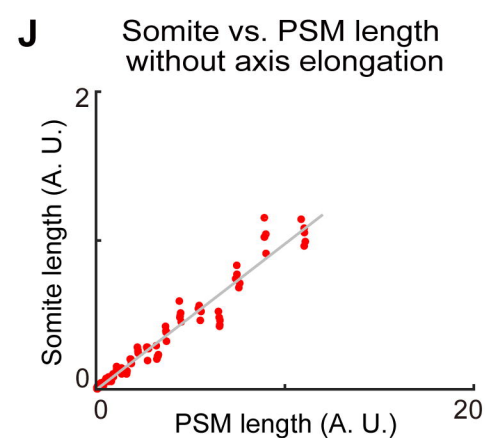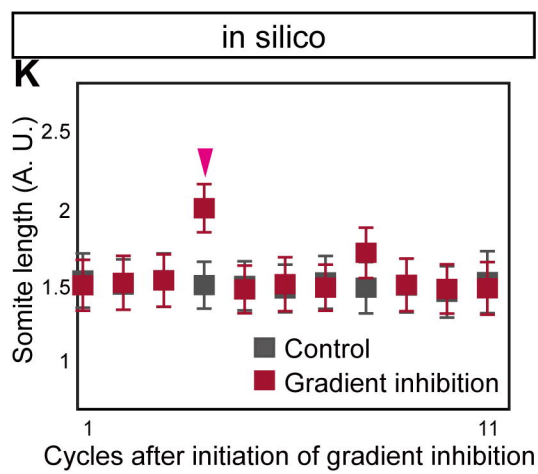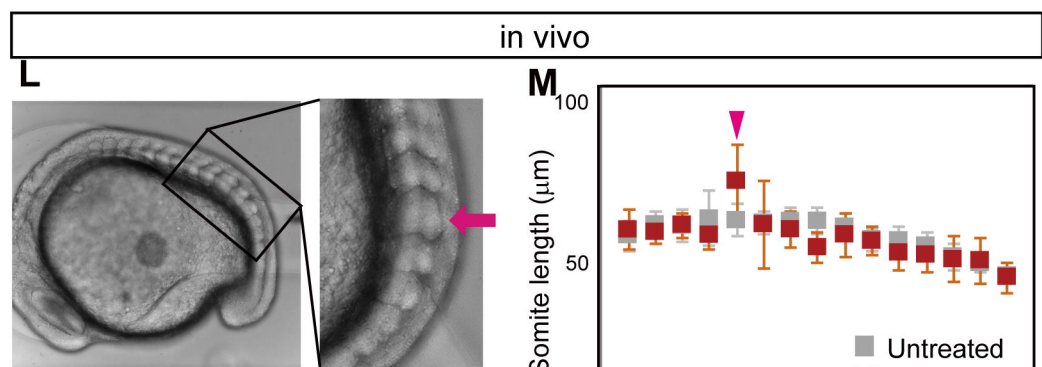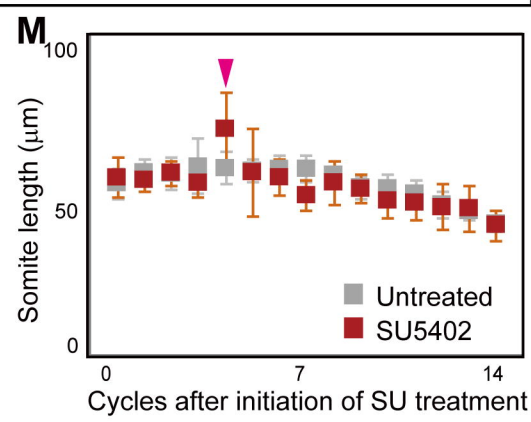

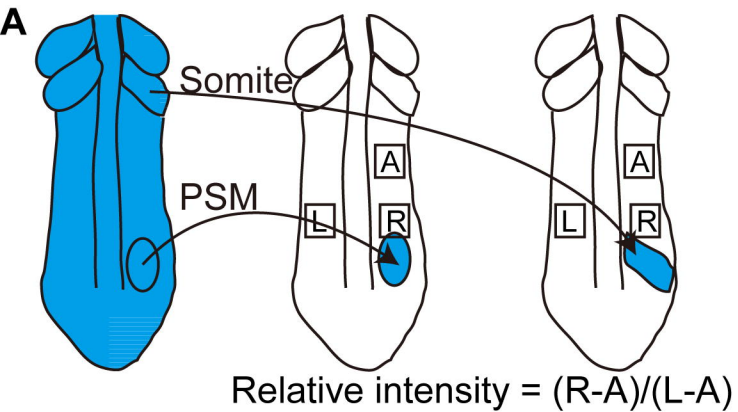

Green: dpERK

Red: Nuclei

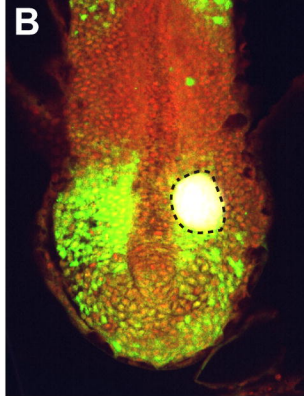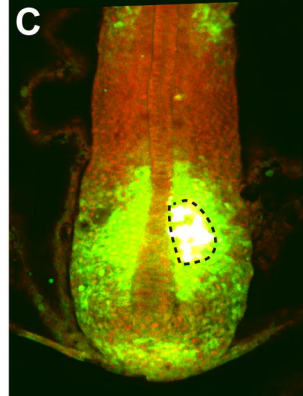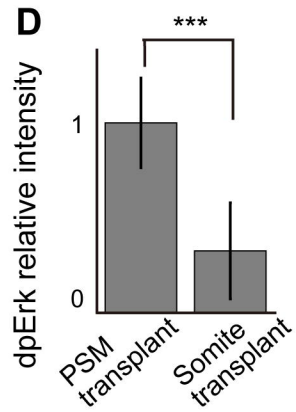

# Rational for "echo" experiment

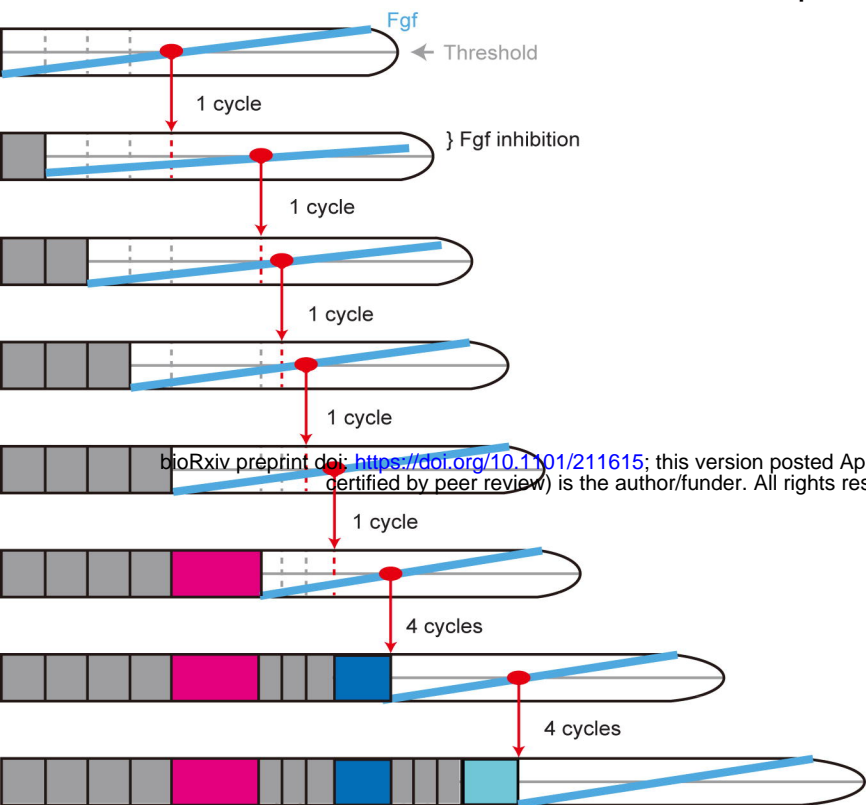

i) 4 somites already specified

ii) transient Fgf inhibition shifts specification position

iii) larger somite specified

iv) Fgf inhibition relieved

v) Somite size recovers

v) larger somite made, anterior PSM boundary jumps, specification position jumps

vi) another larger somite made

vi) process repeats

## In silico experiment

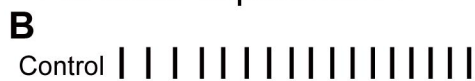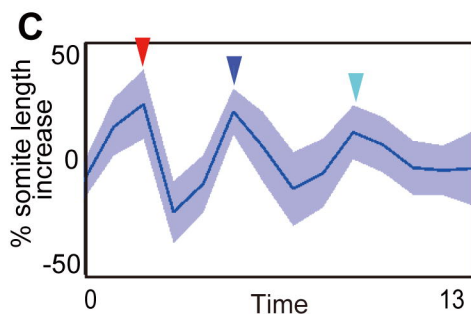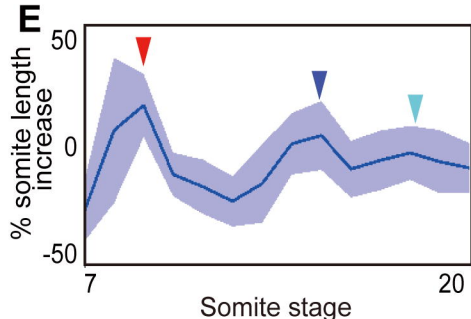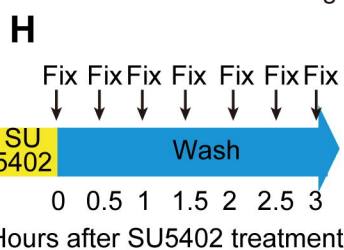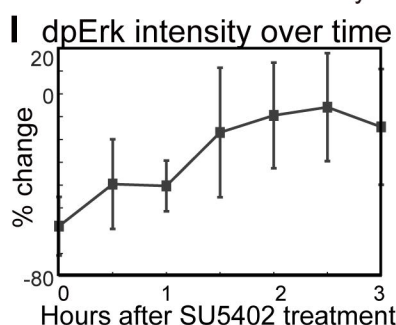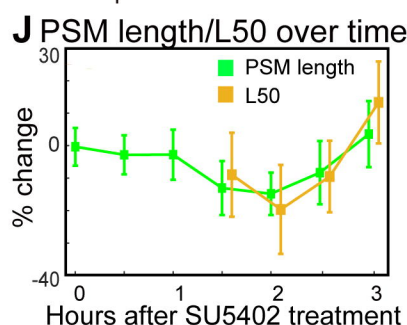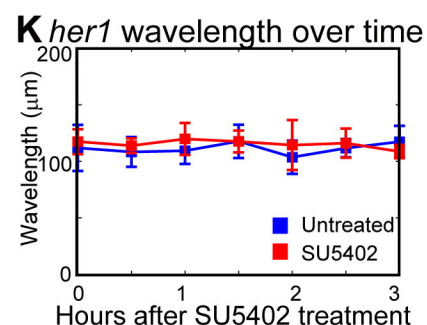

## In silico experiment

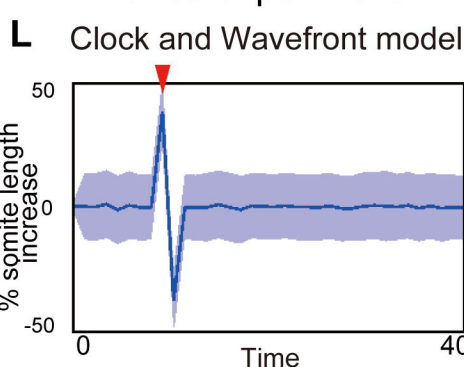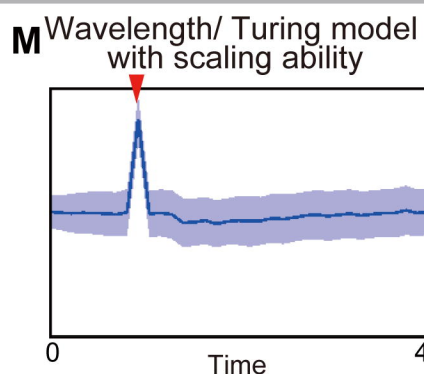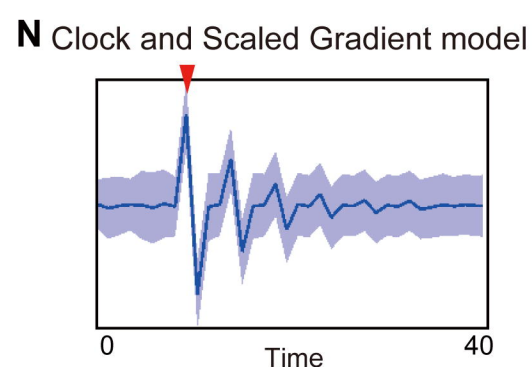

## In vivo experiment

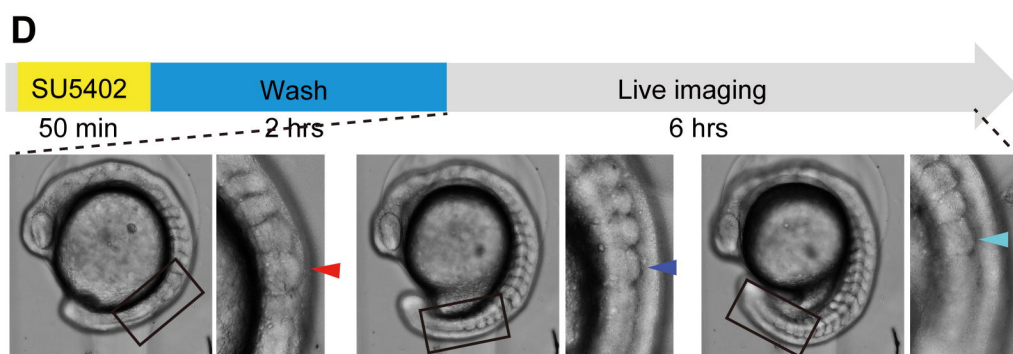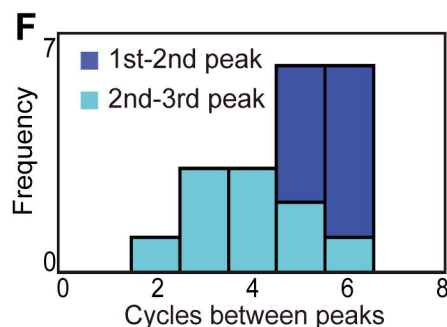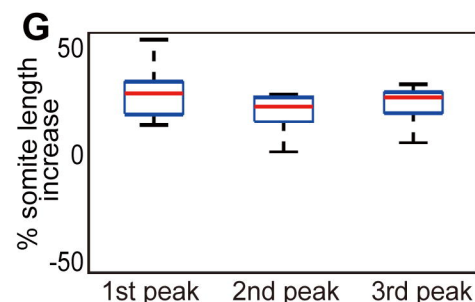

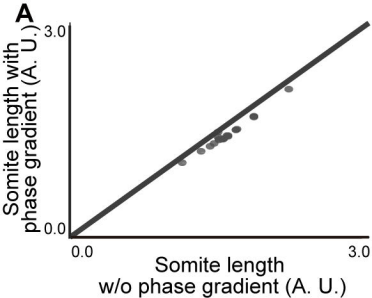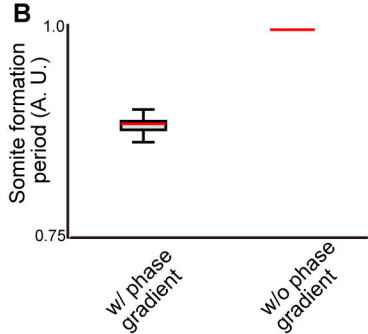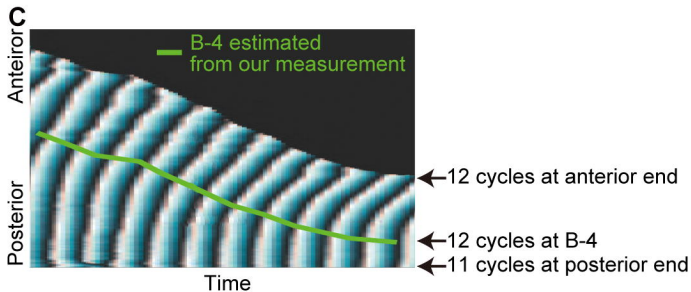

(Altered from Soroldoni et al. 2014)
